# Supplementary figures and images for: GC–MS-Based Nontargeted and Targeted Metabolic Profiling Identifies Changes in the Lentinula edodes Mycelial Metabolome under High-Temperature Stress
Source: MDPI journal article supplement (doi:10.3390/ijms20092330), 2019-05-10

Volcanoplot

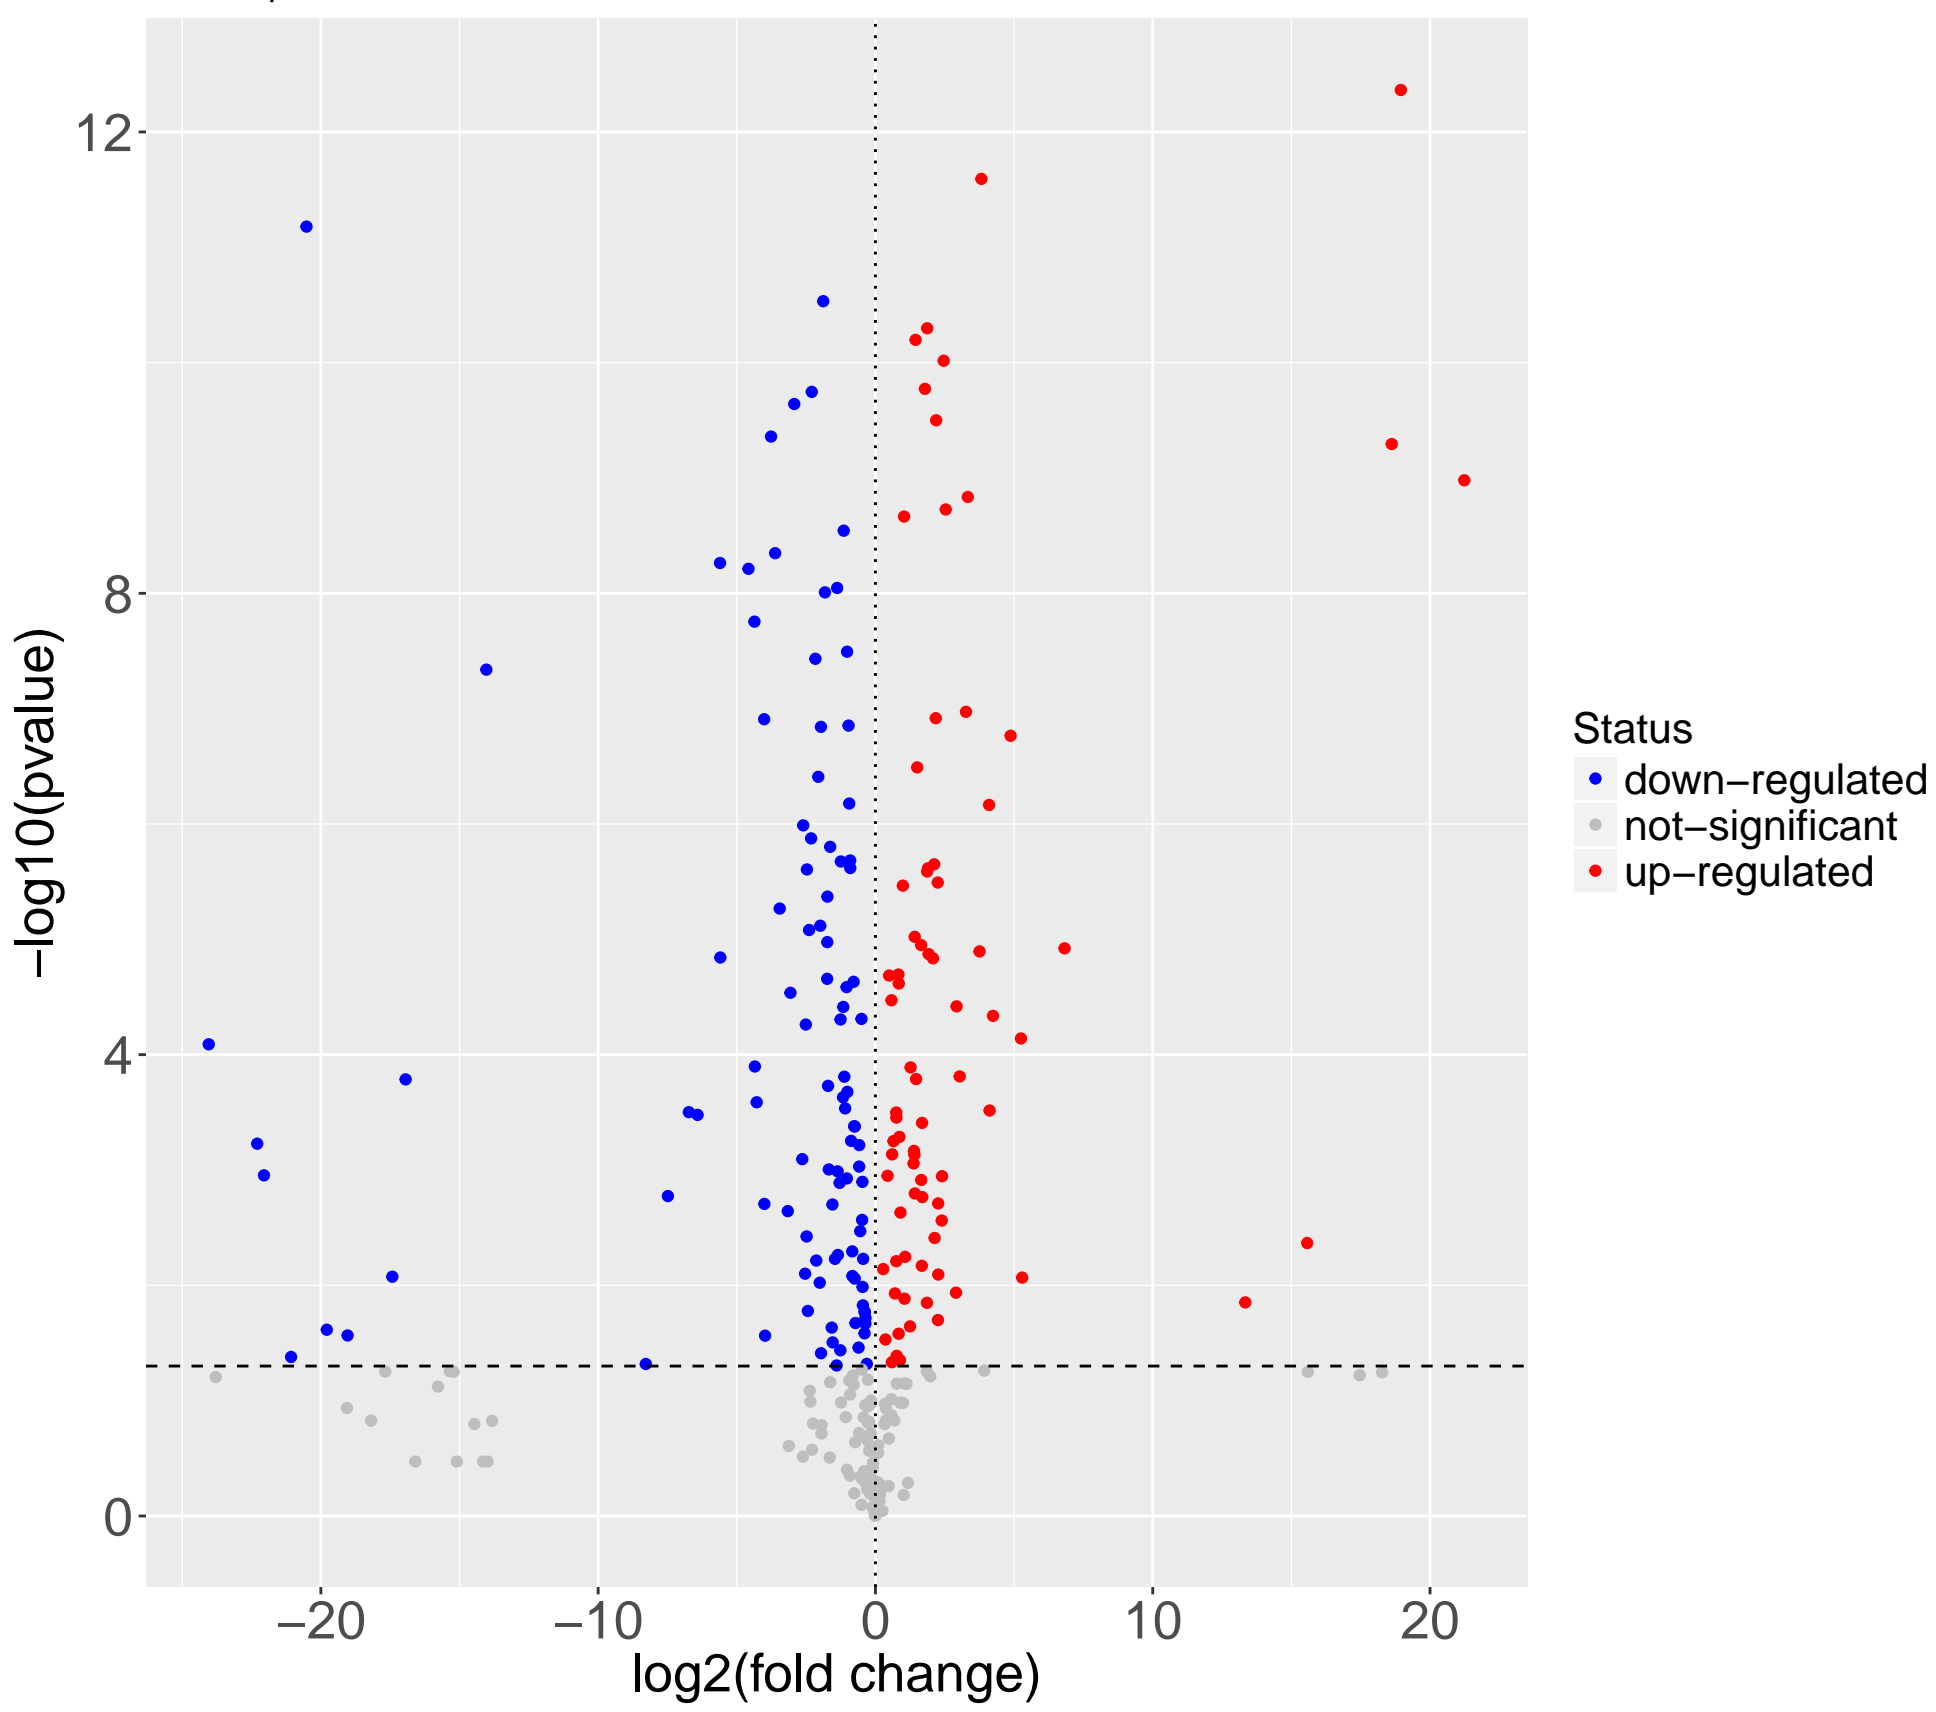

Supplement: s1 [file s1]

Volcanoplot

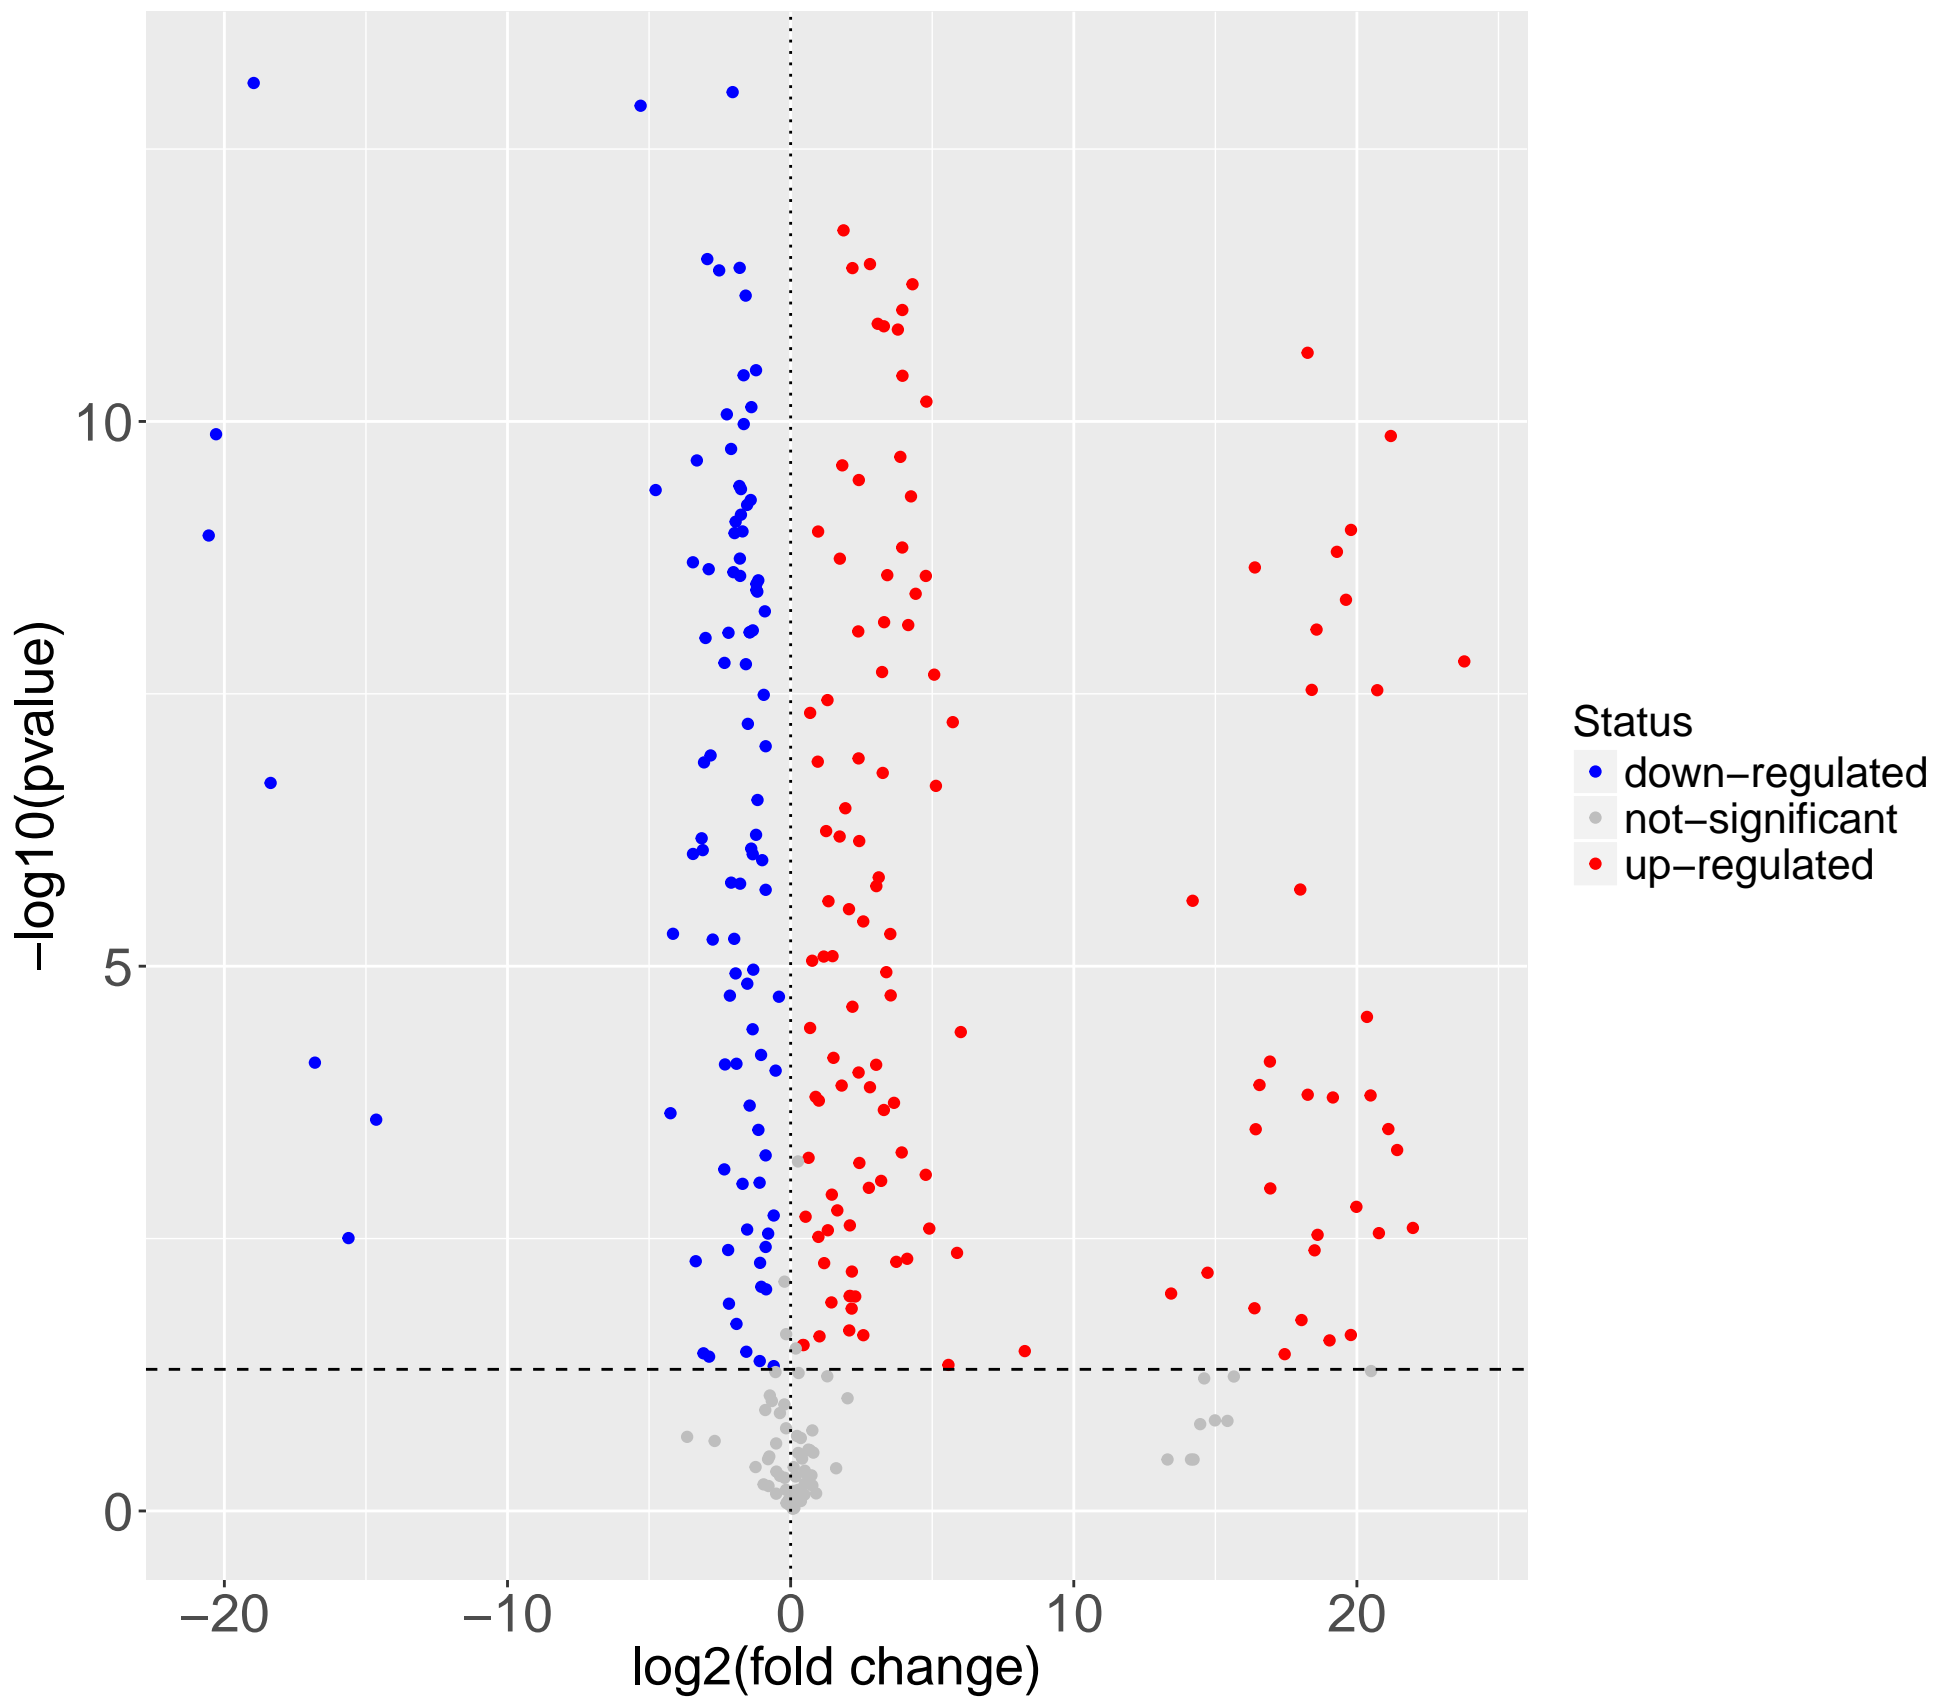

Supplement: s1 [file s1]

Volcanoplot

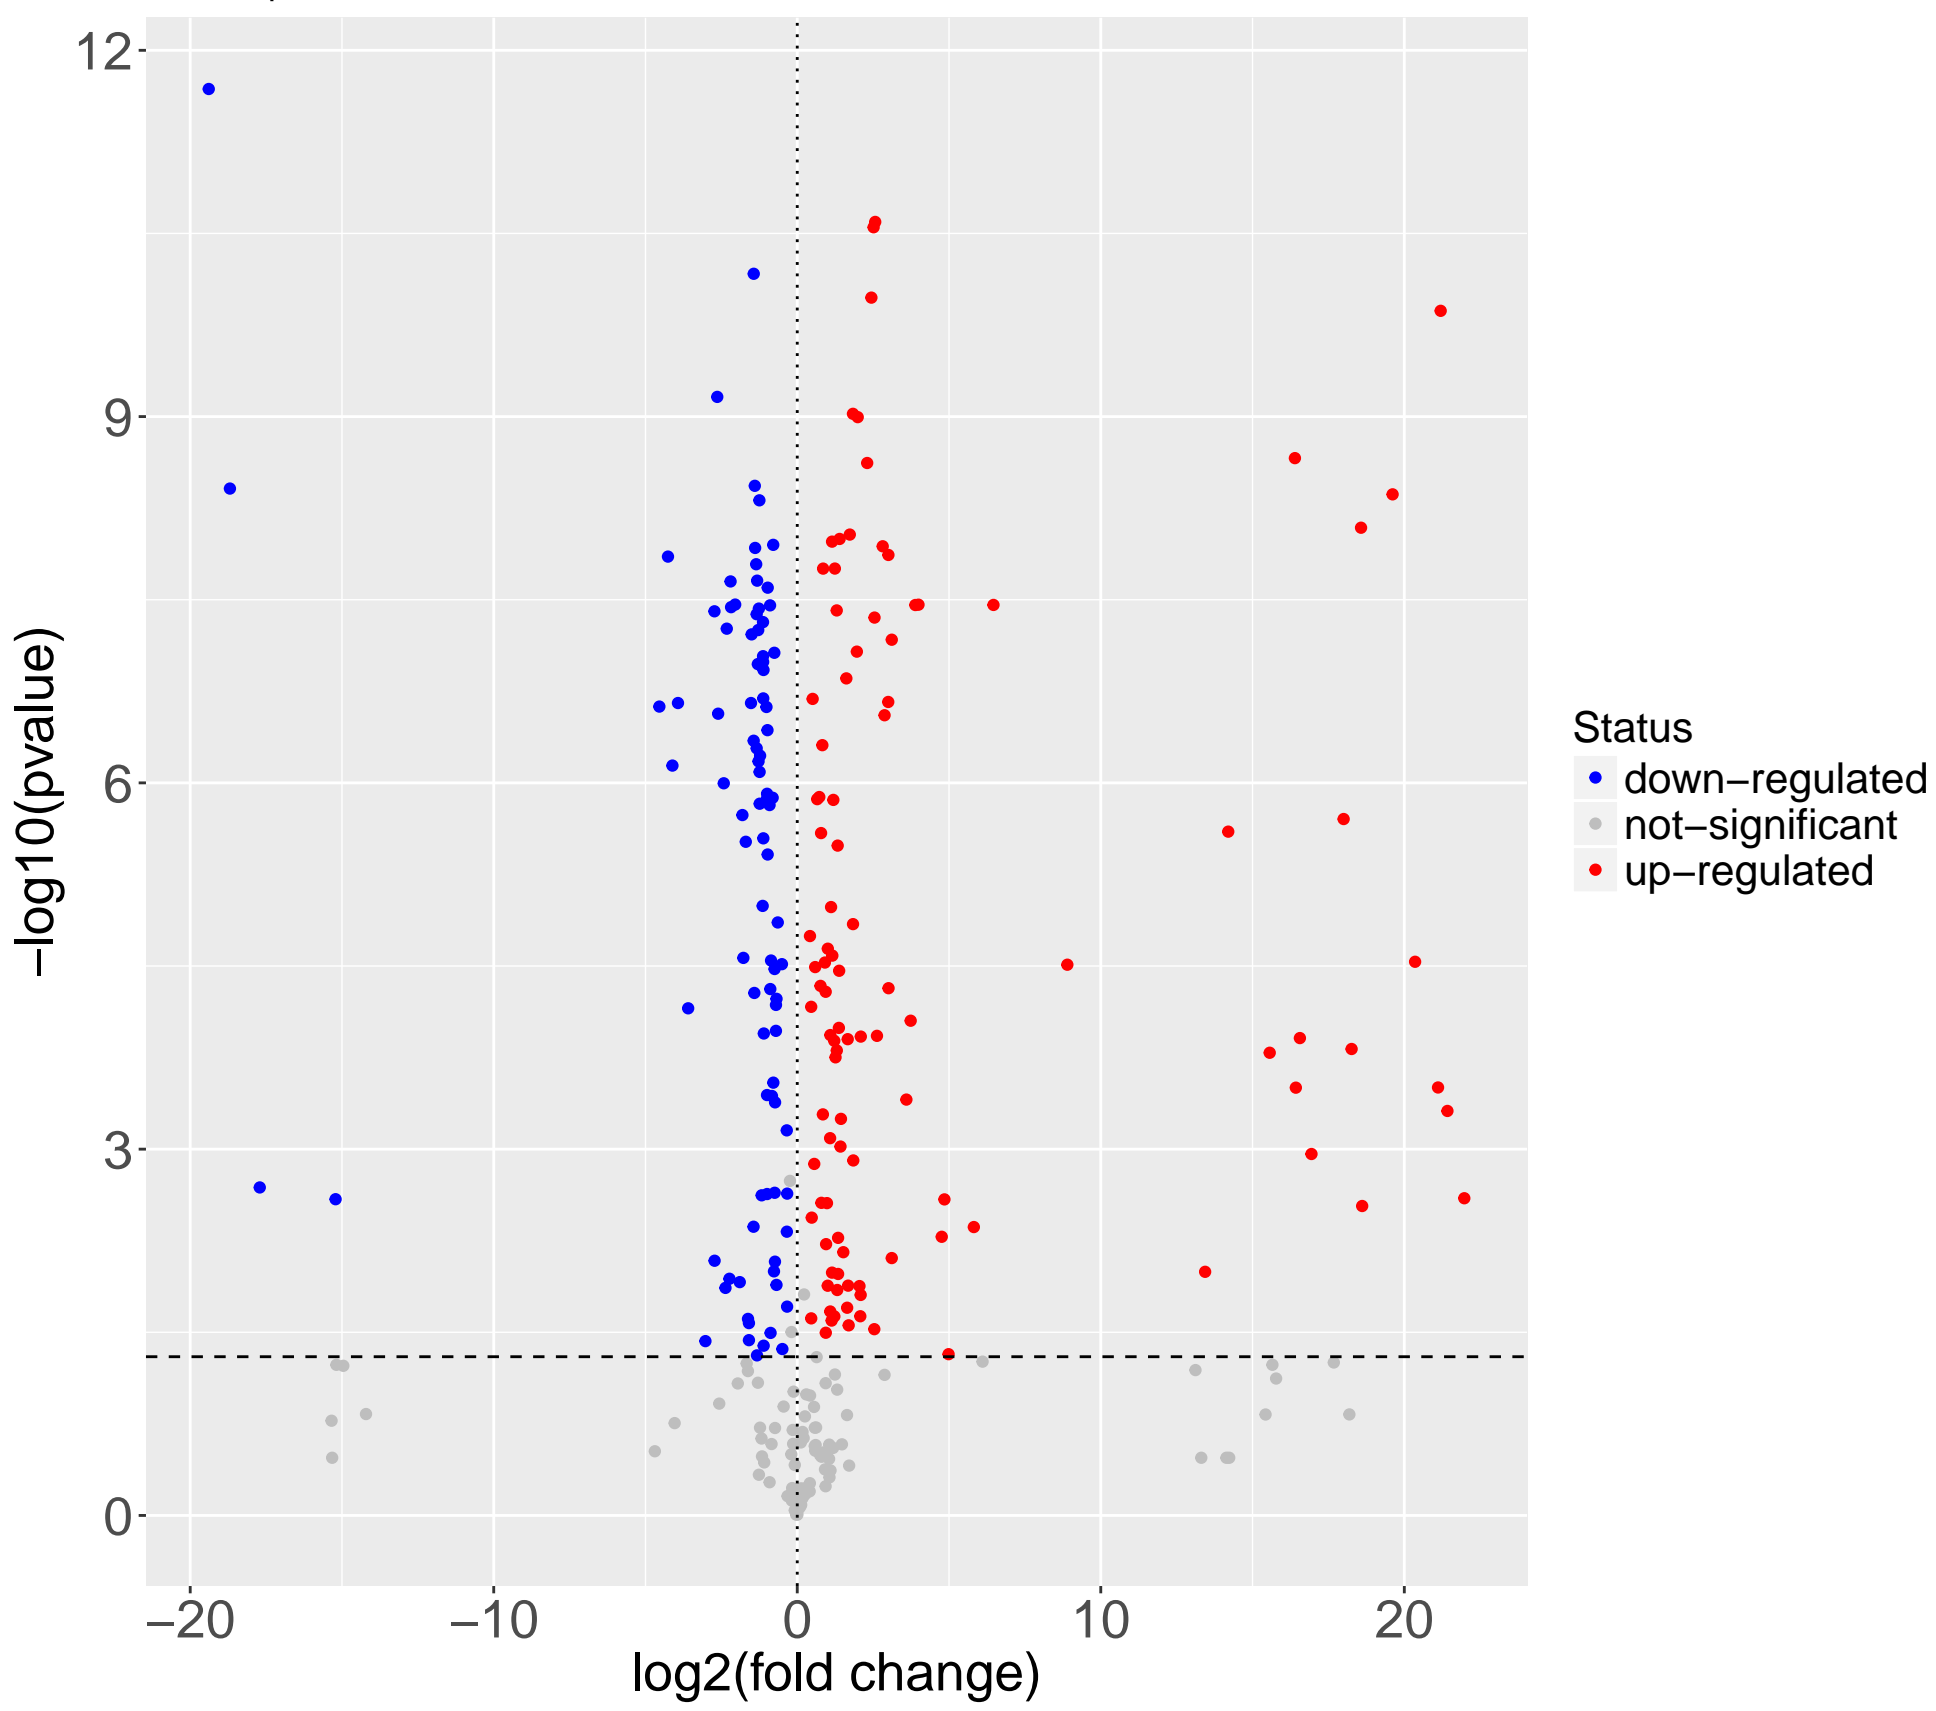

Supplement: s1 [file s1]

Volcanoplot

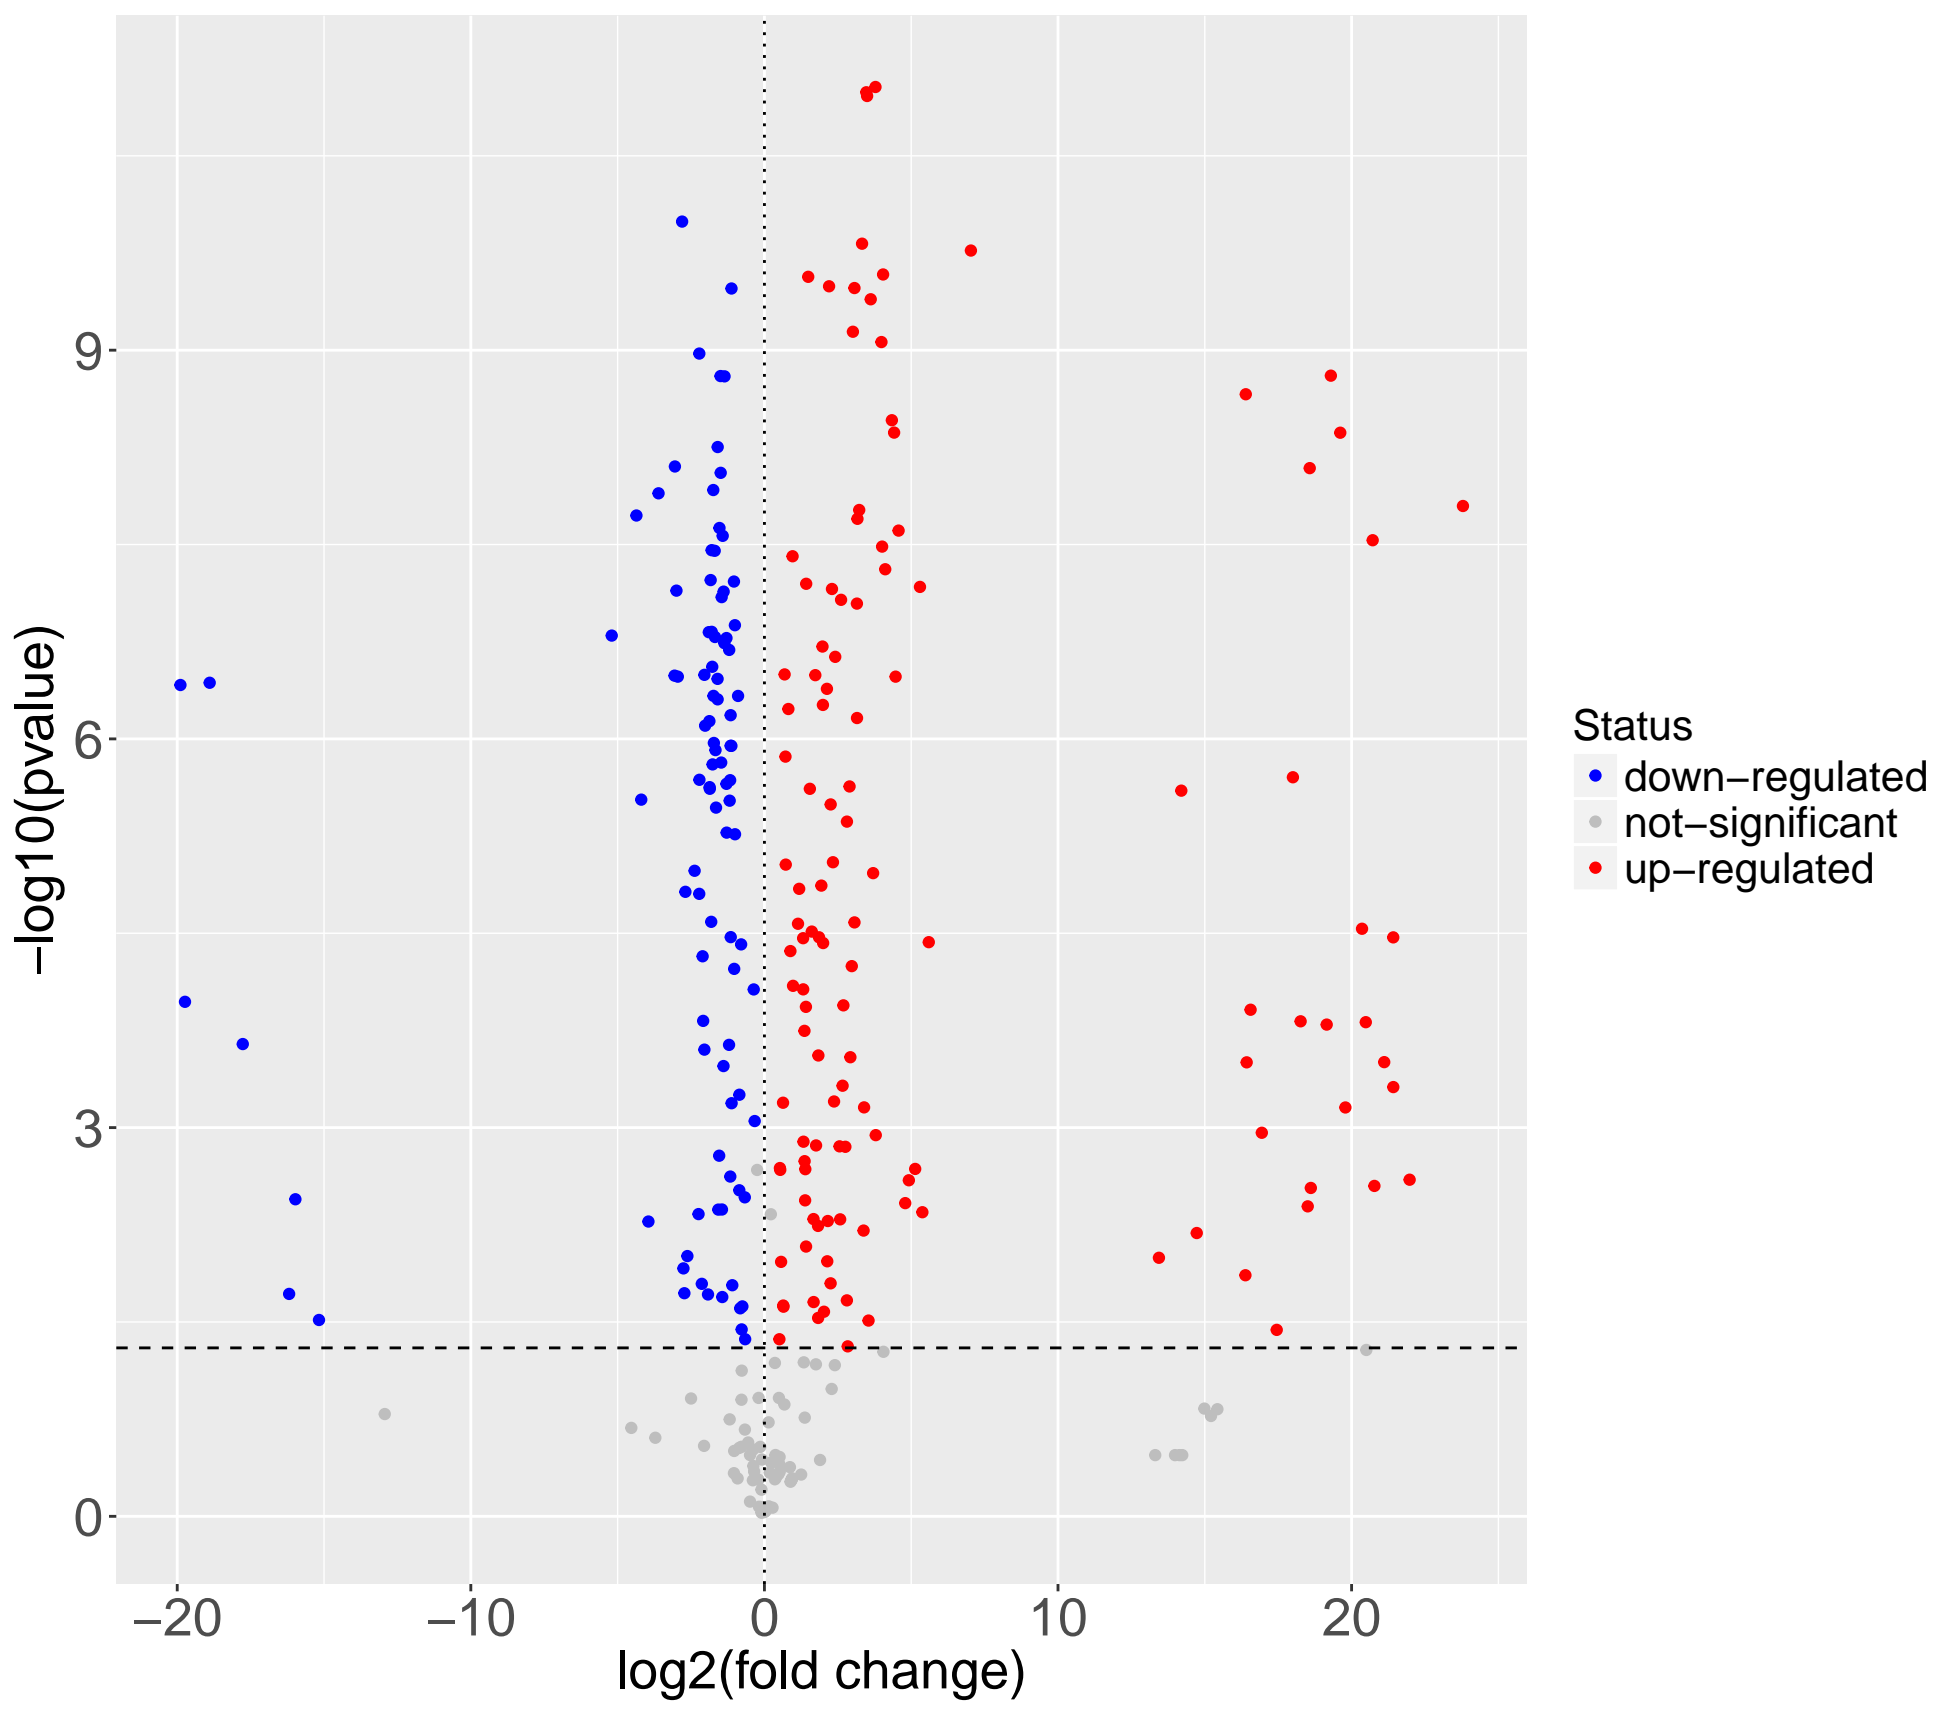

Supplement: s1 [file s1]

Volcanoplot

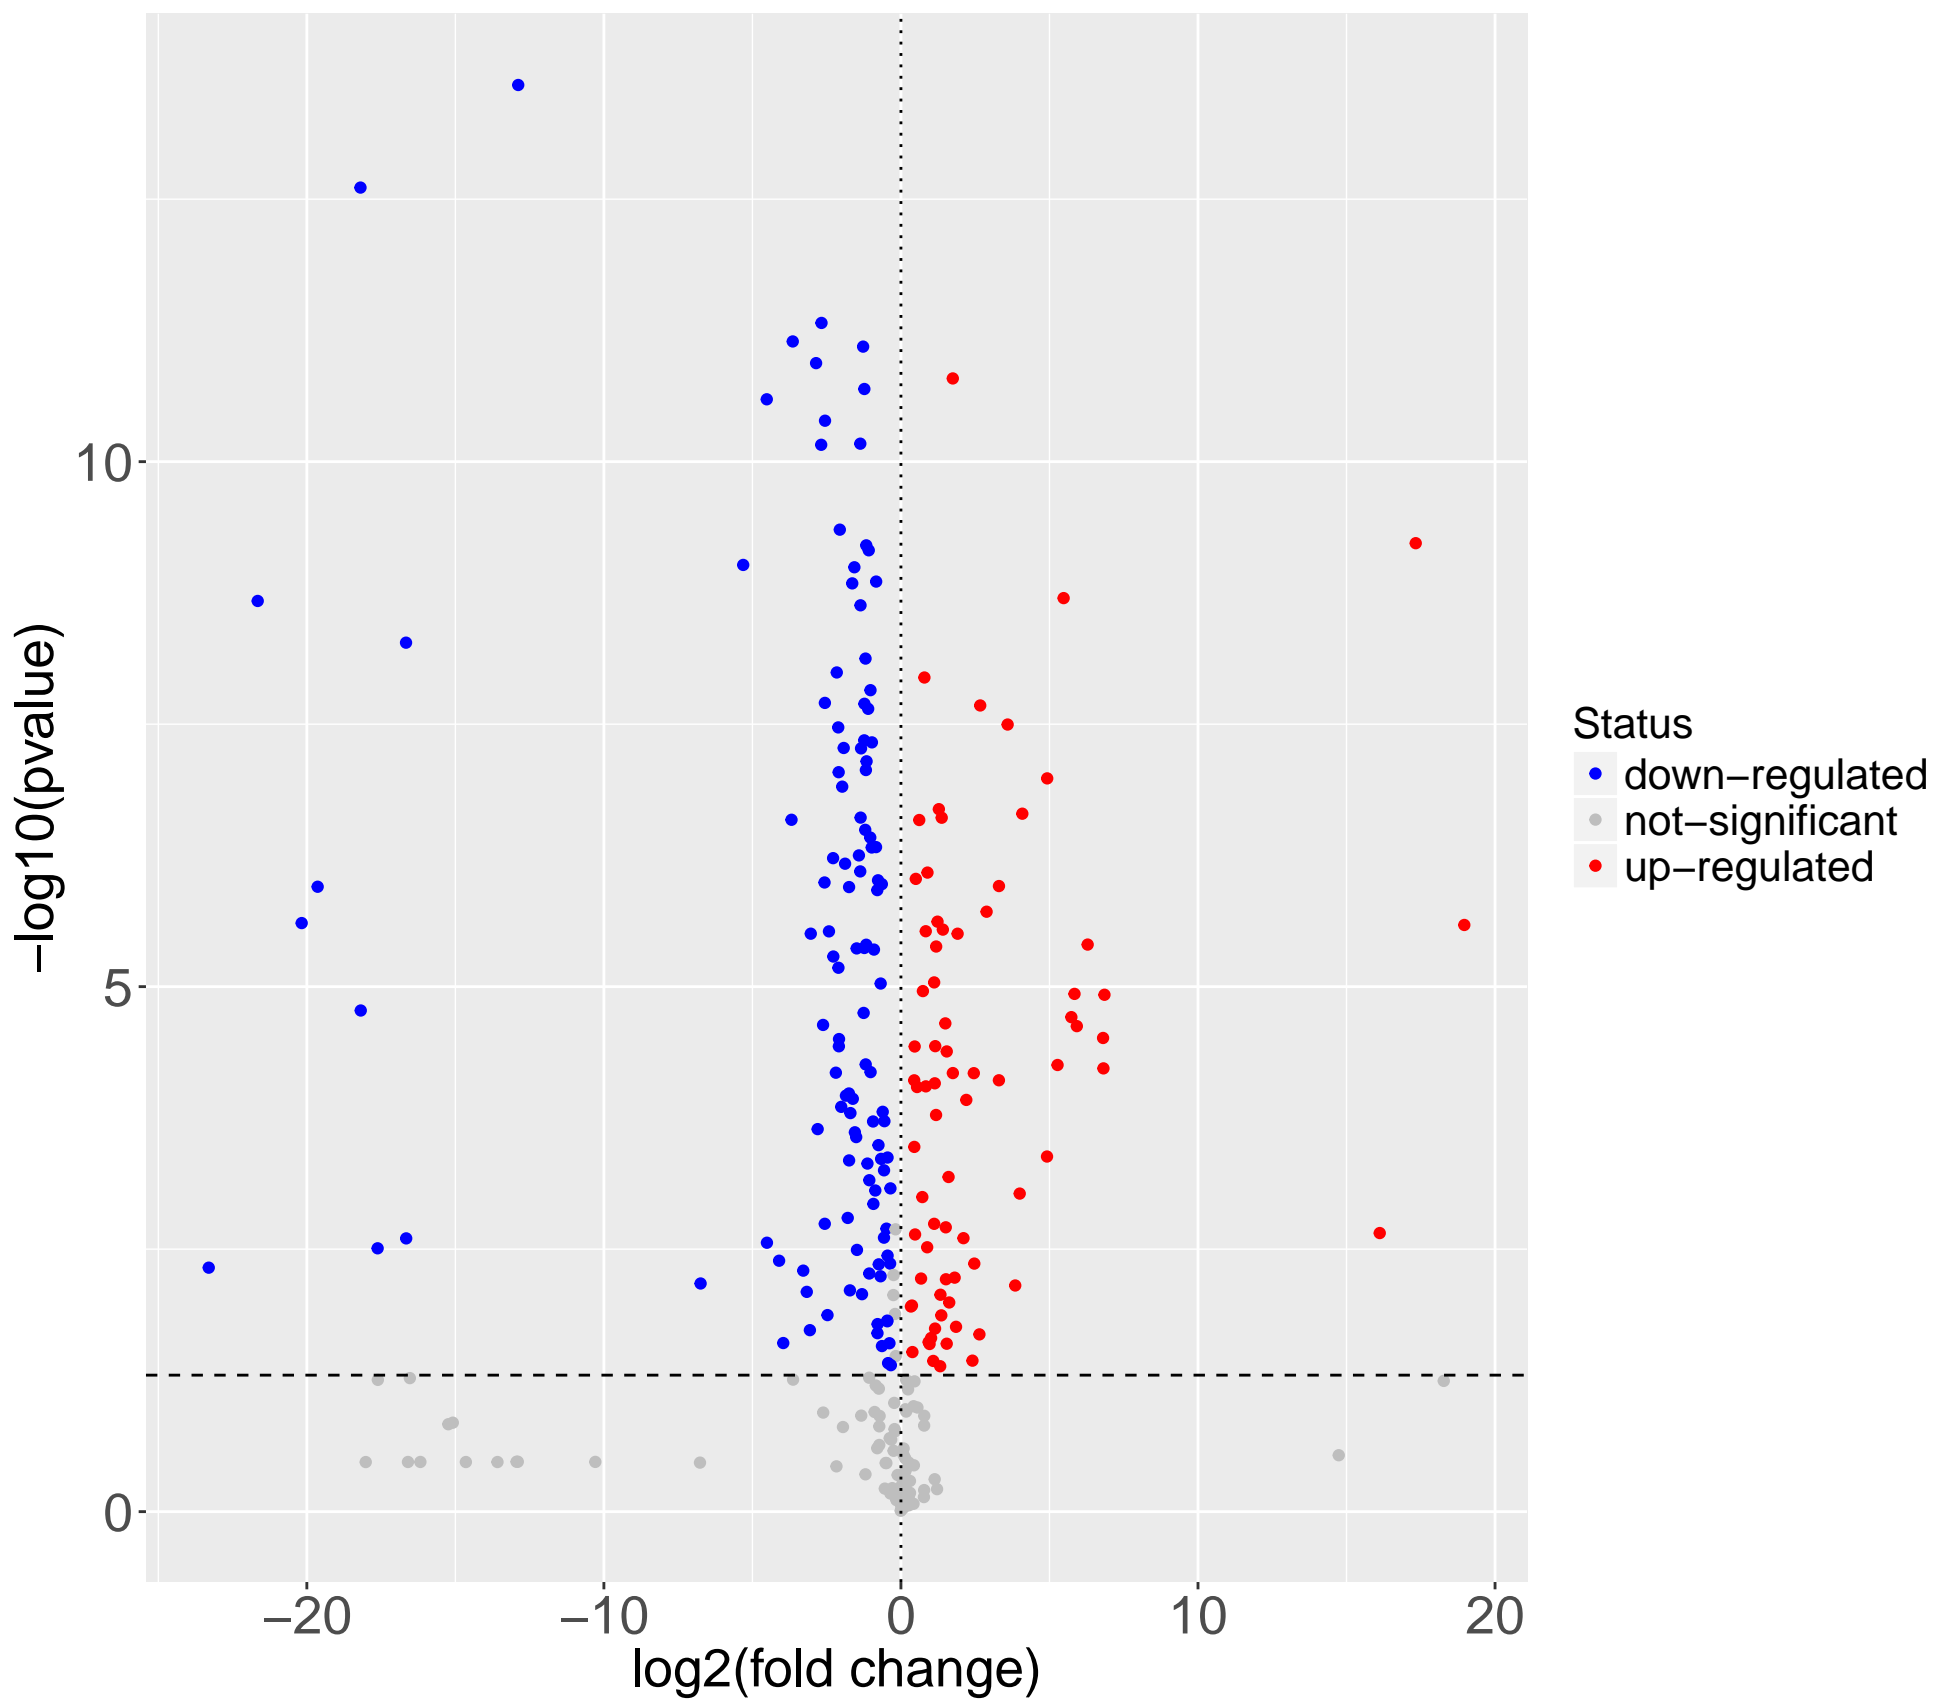

Supplement: s1 [file s1]

Volcanoplot

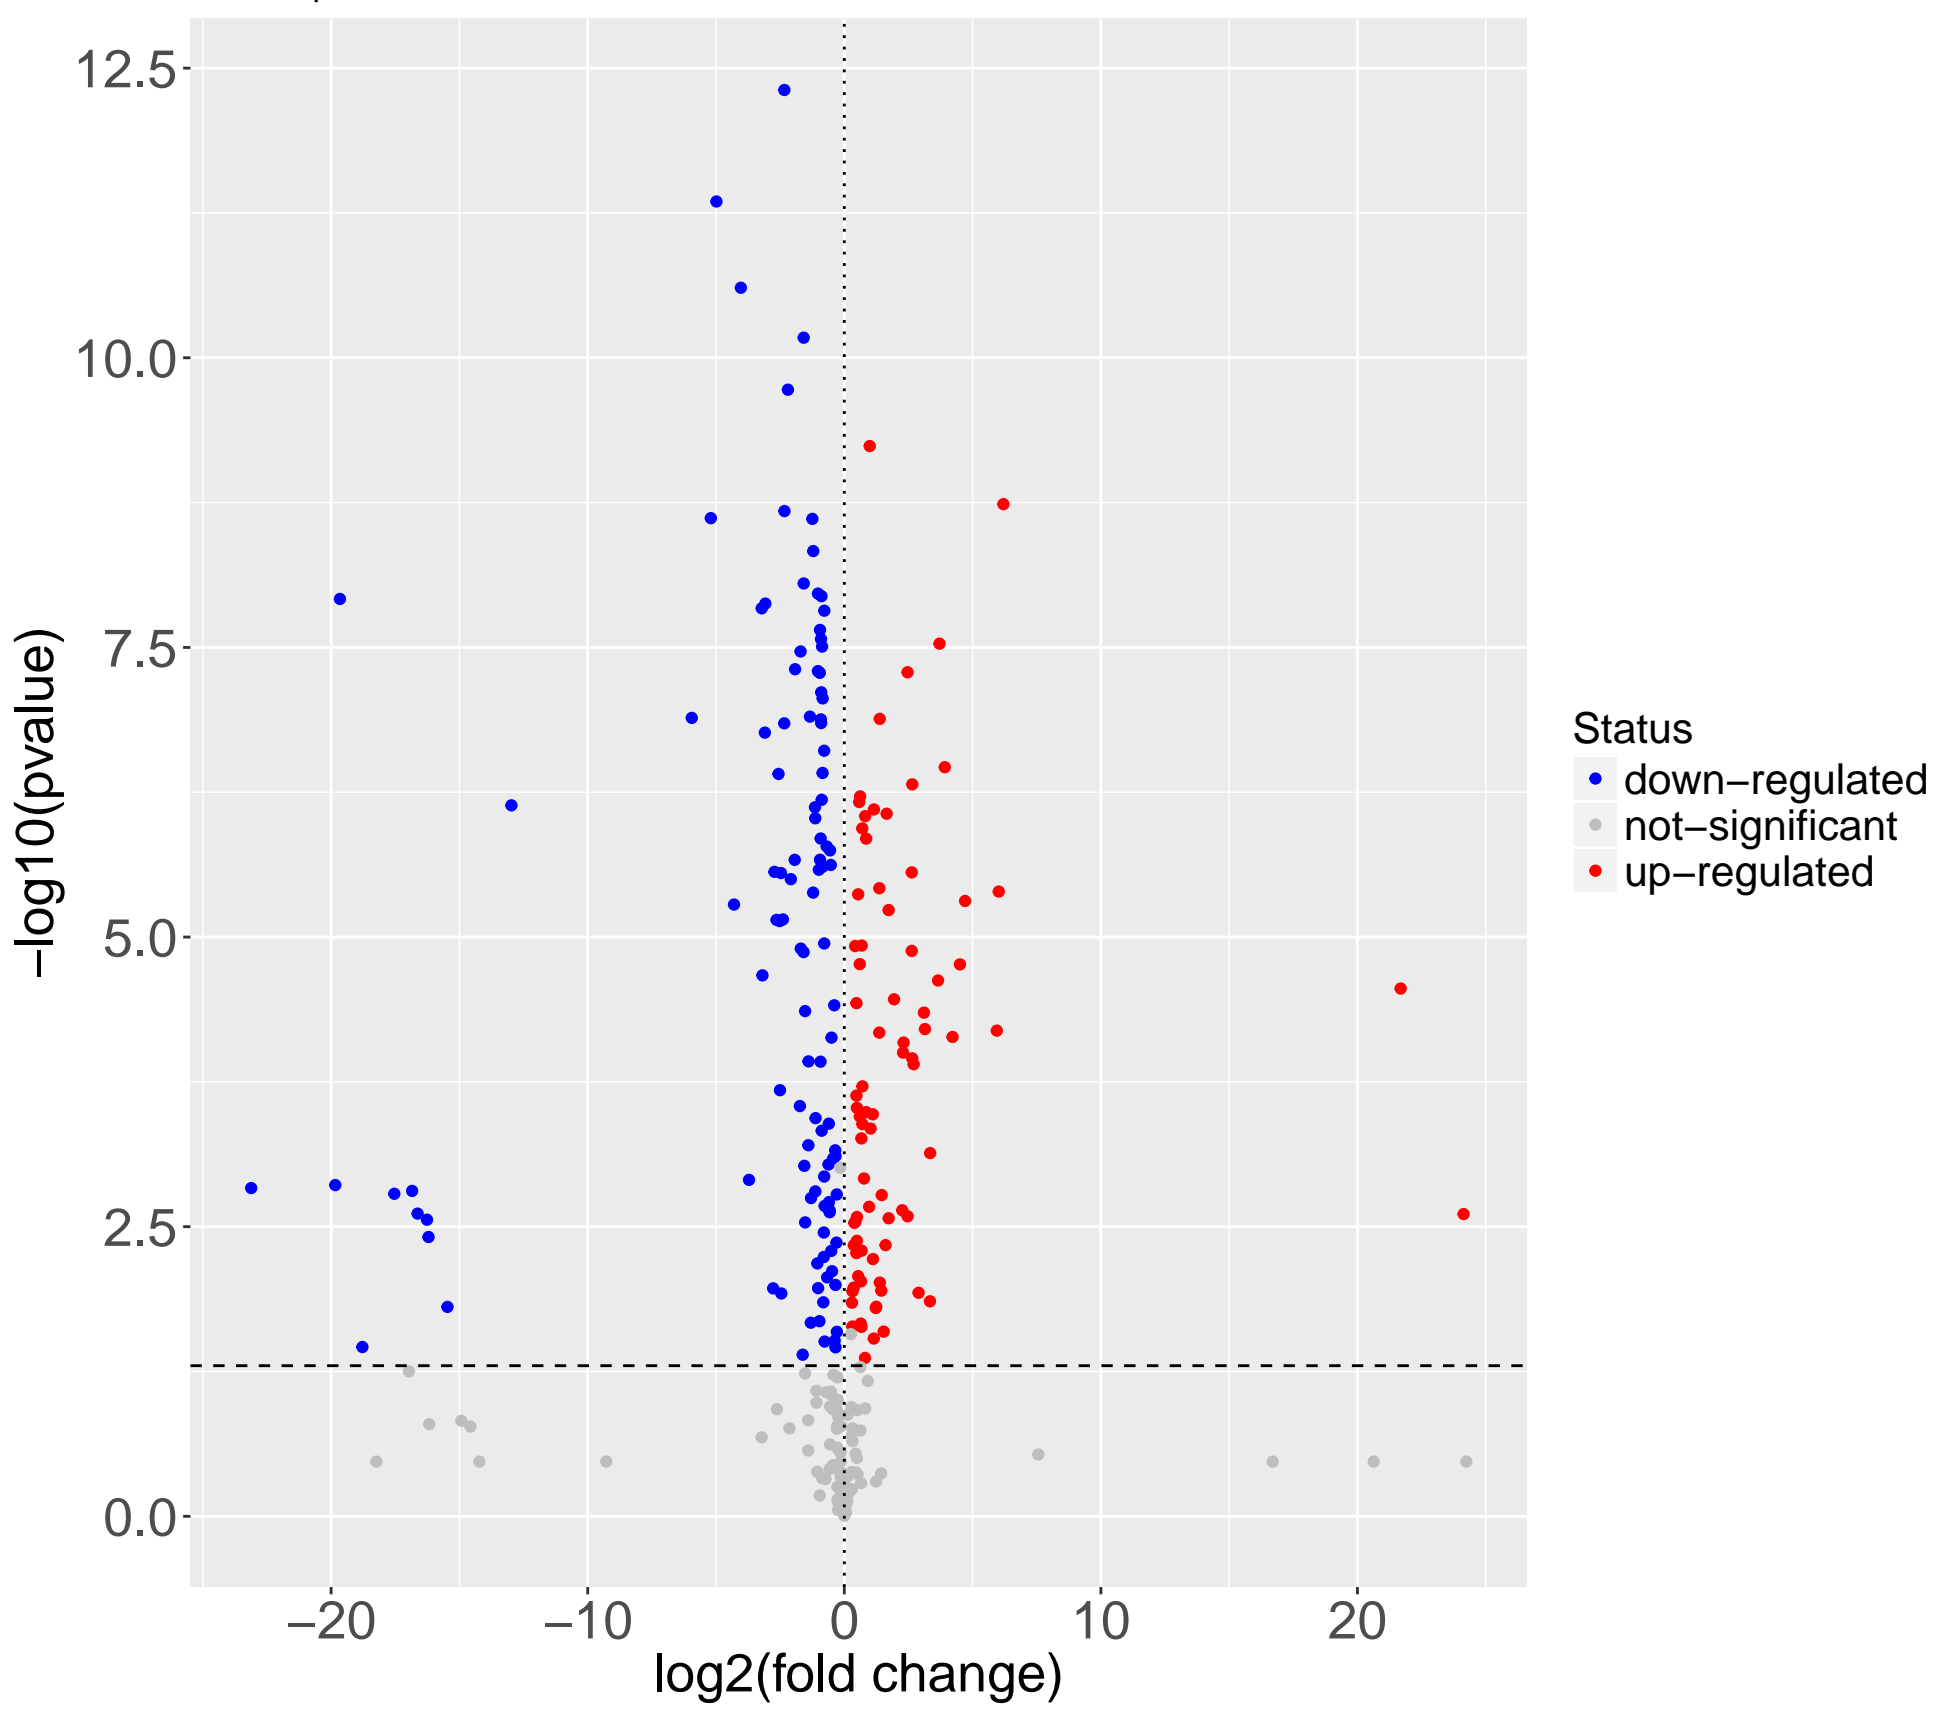

Supplement: s1 [file s1]

Volcanoplot

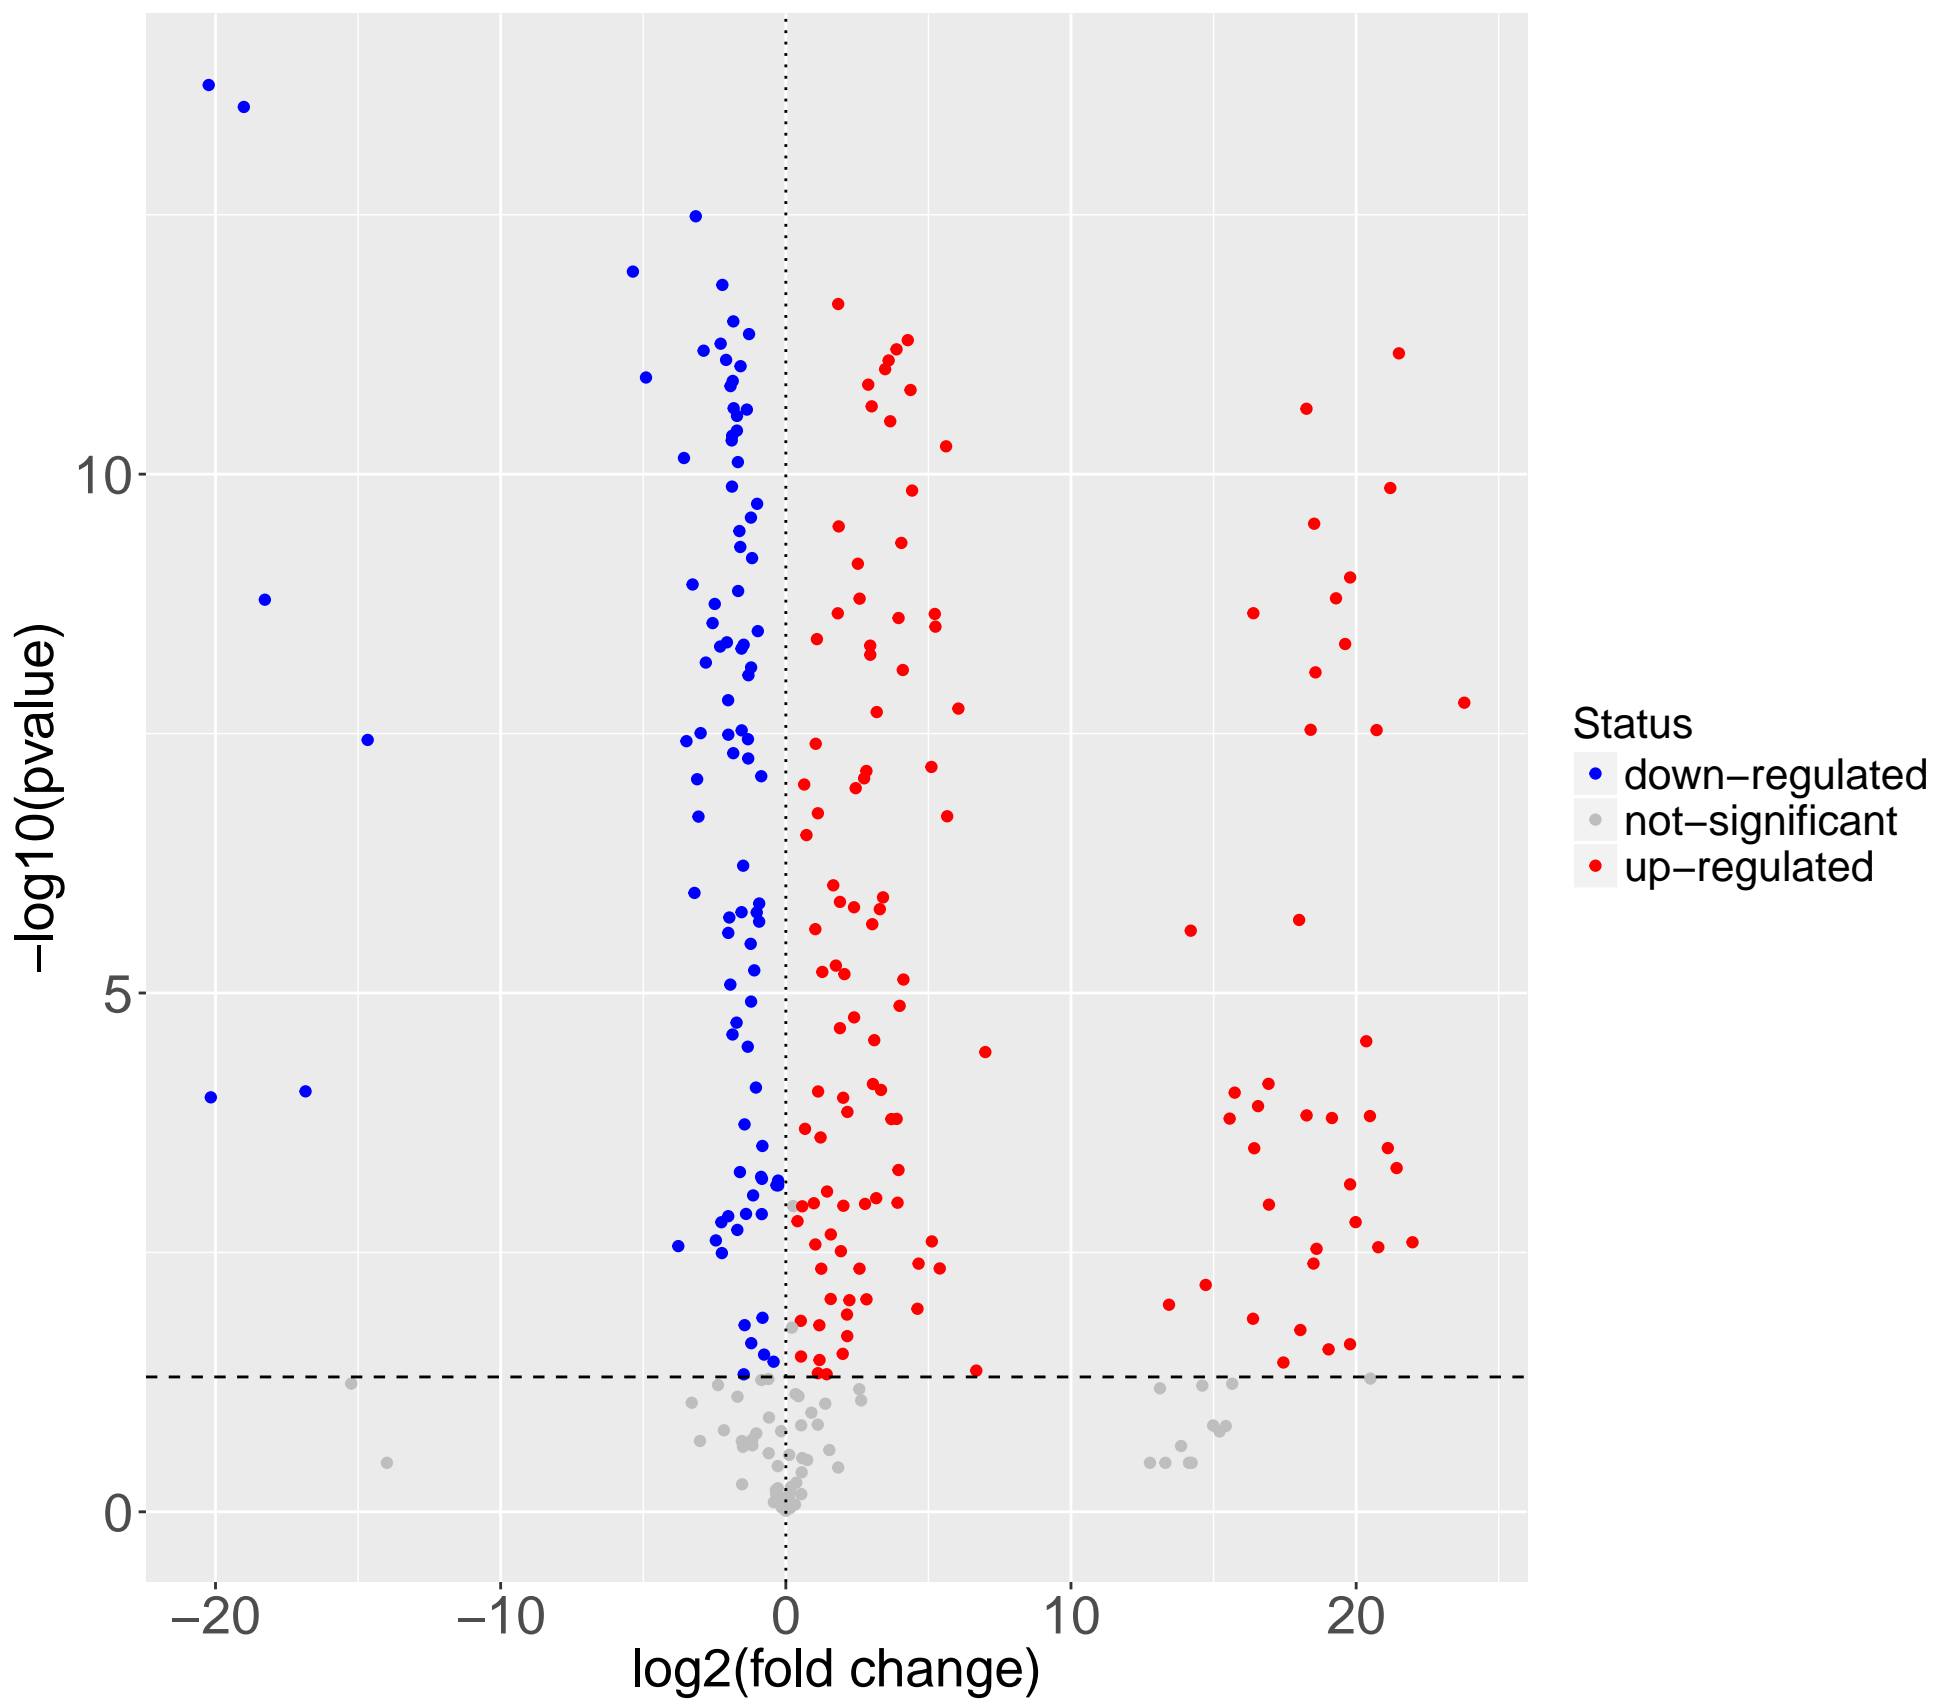

Supplement: s1 [file s1]

Volcanoplot

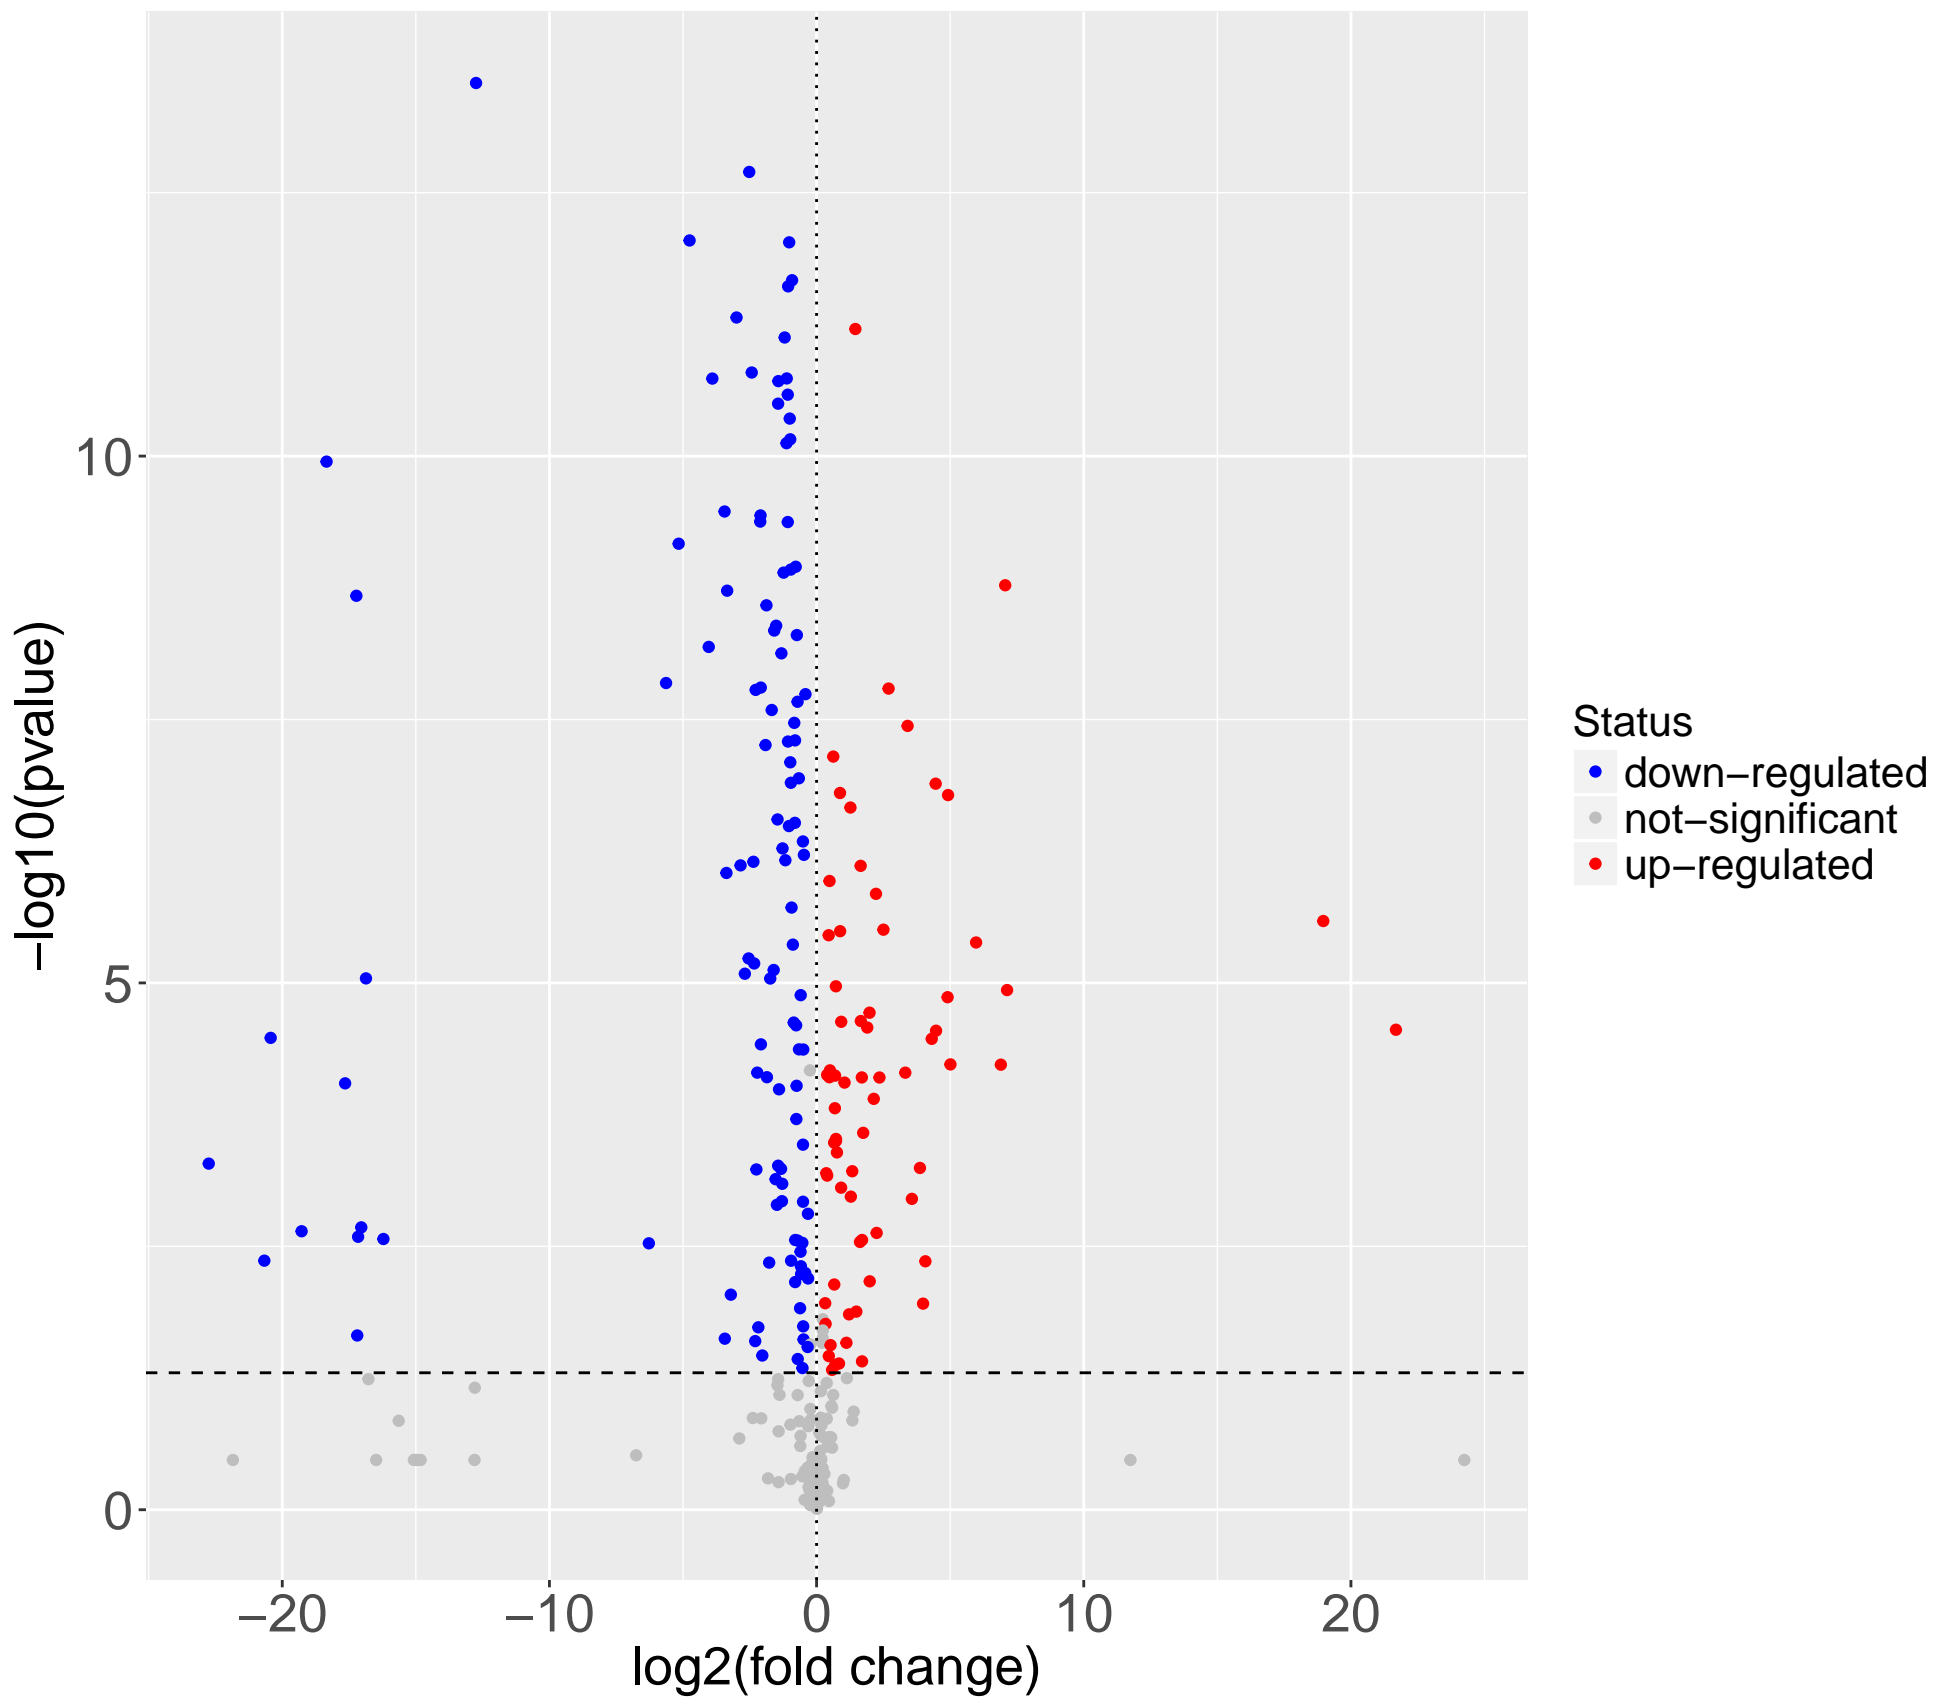

Supplement: s1 [file s1]

Volcanoplot

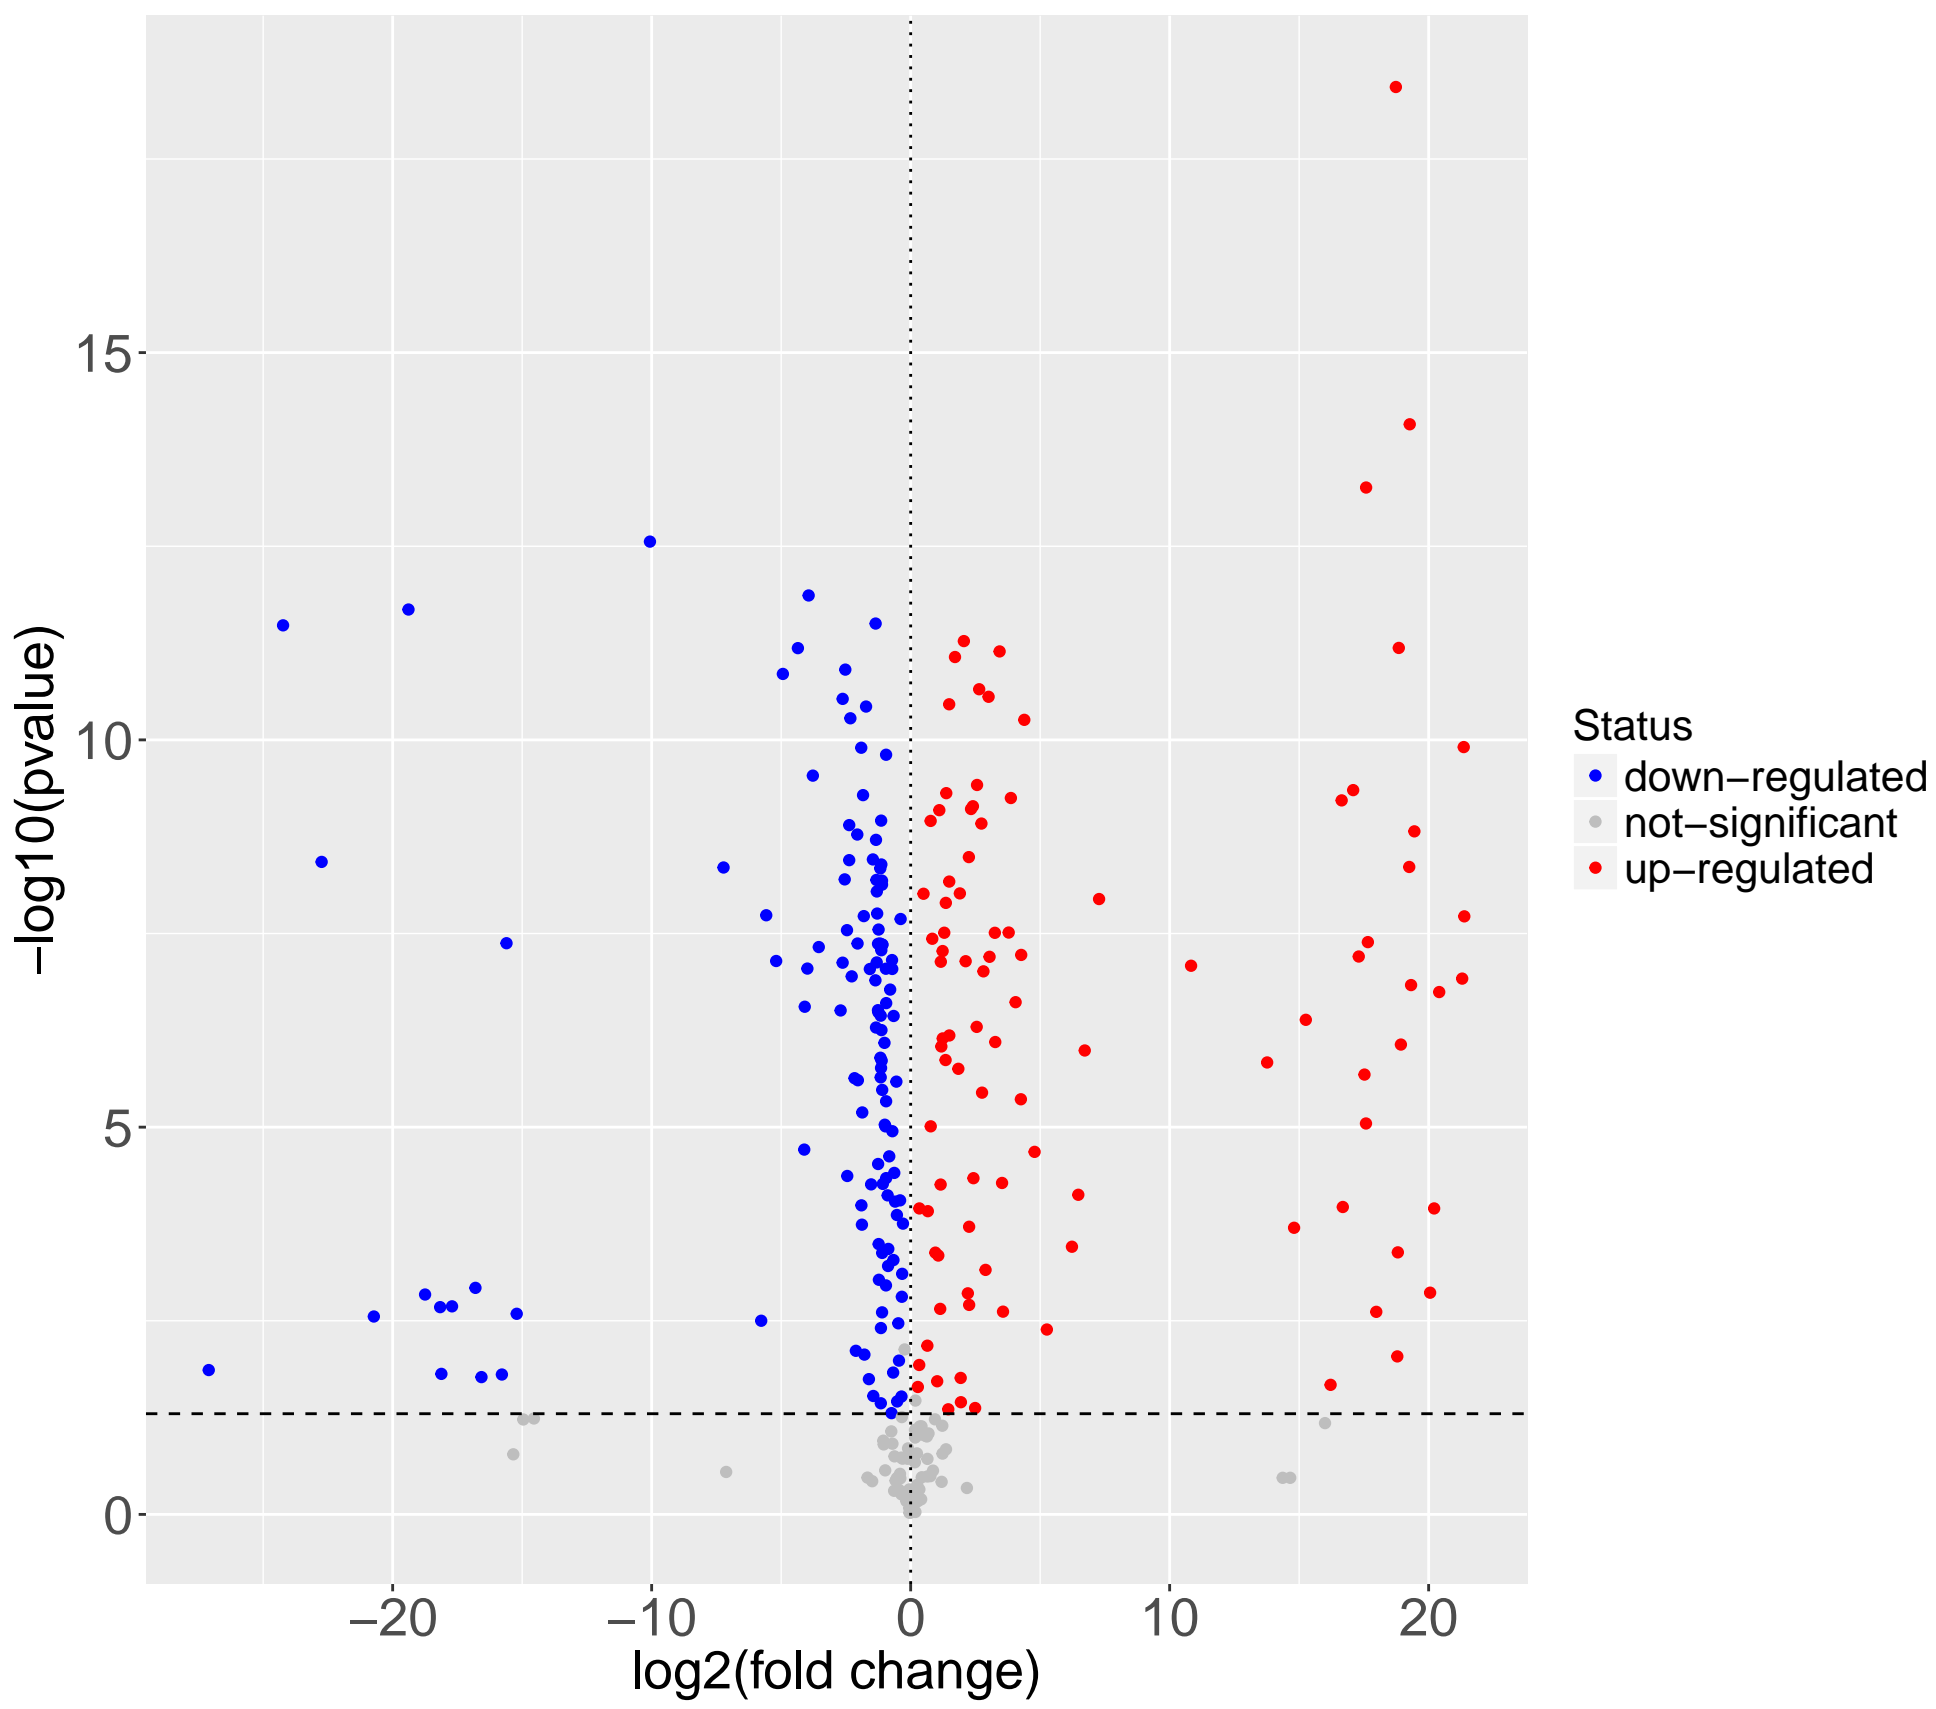

Supplement: s1 [file s1]

Volcanoplot

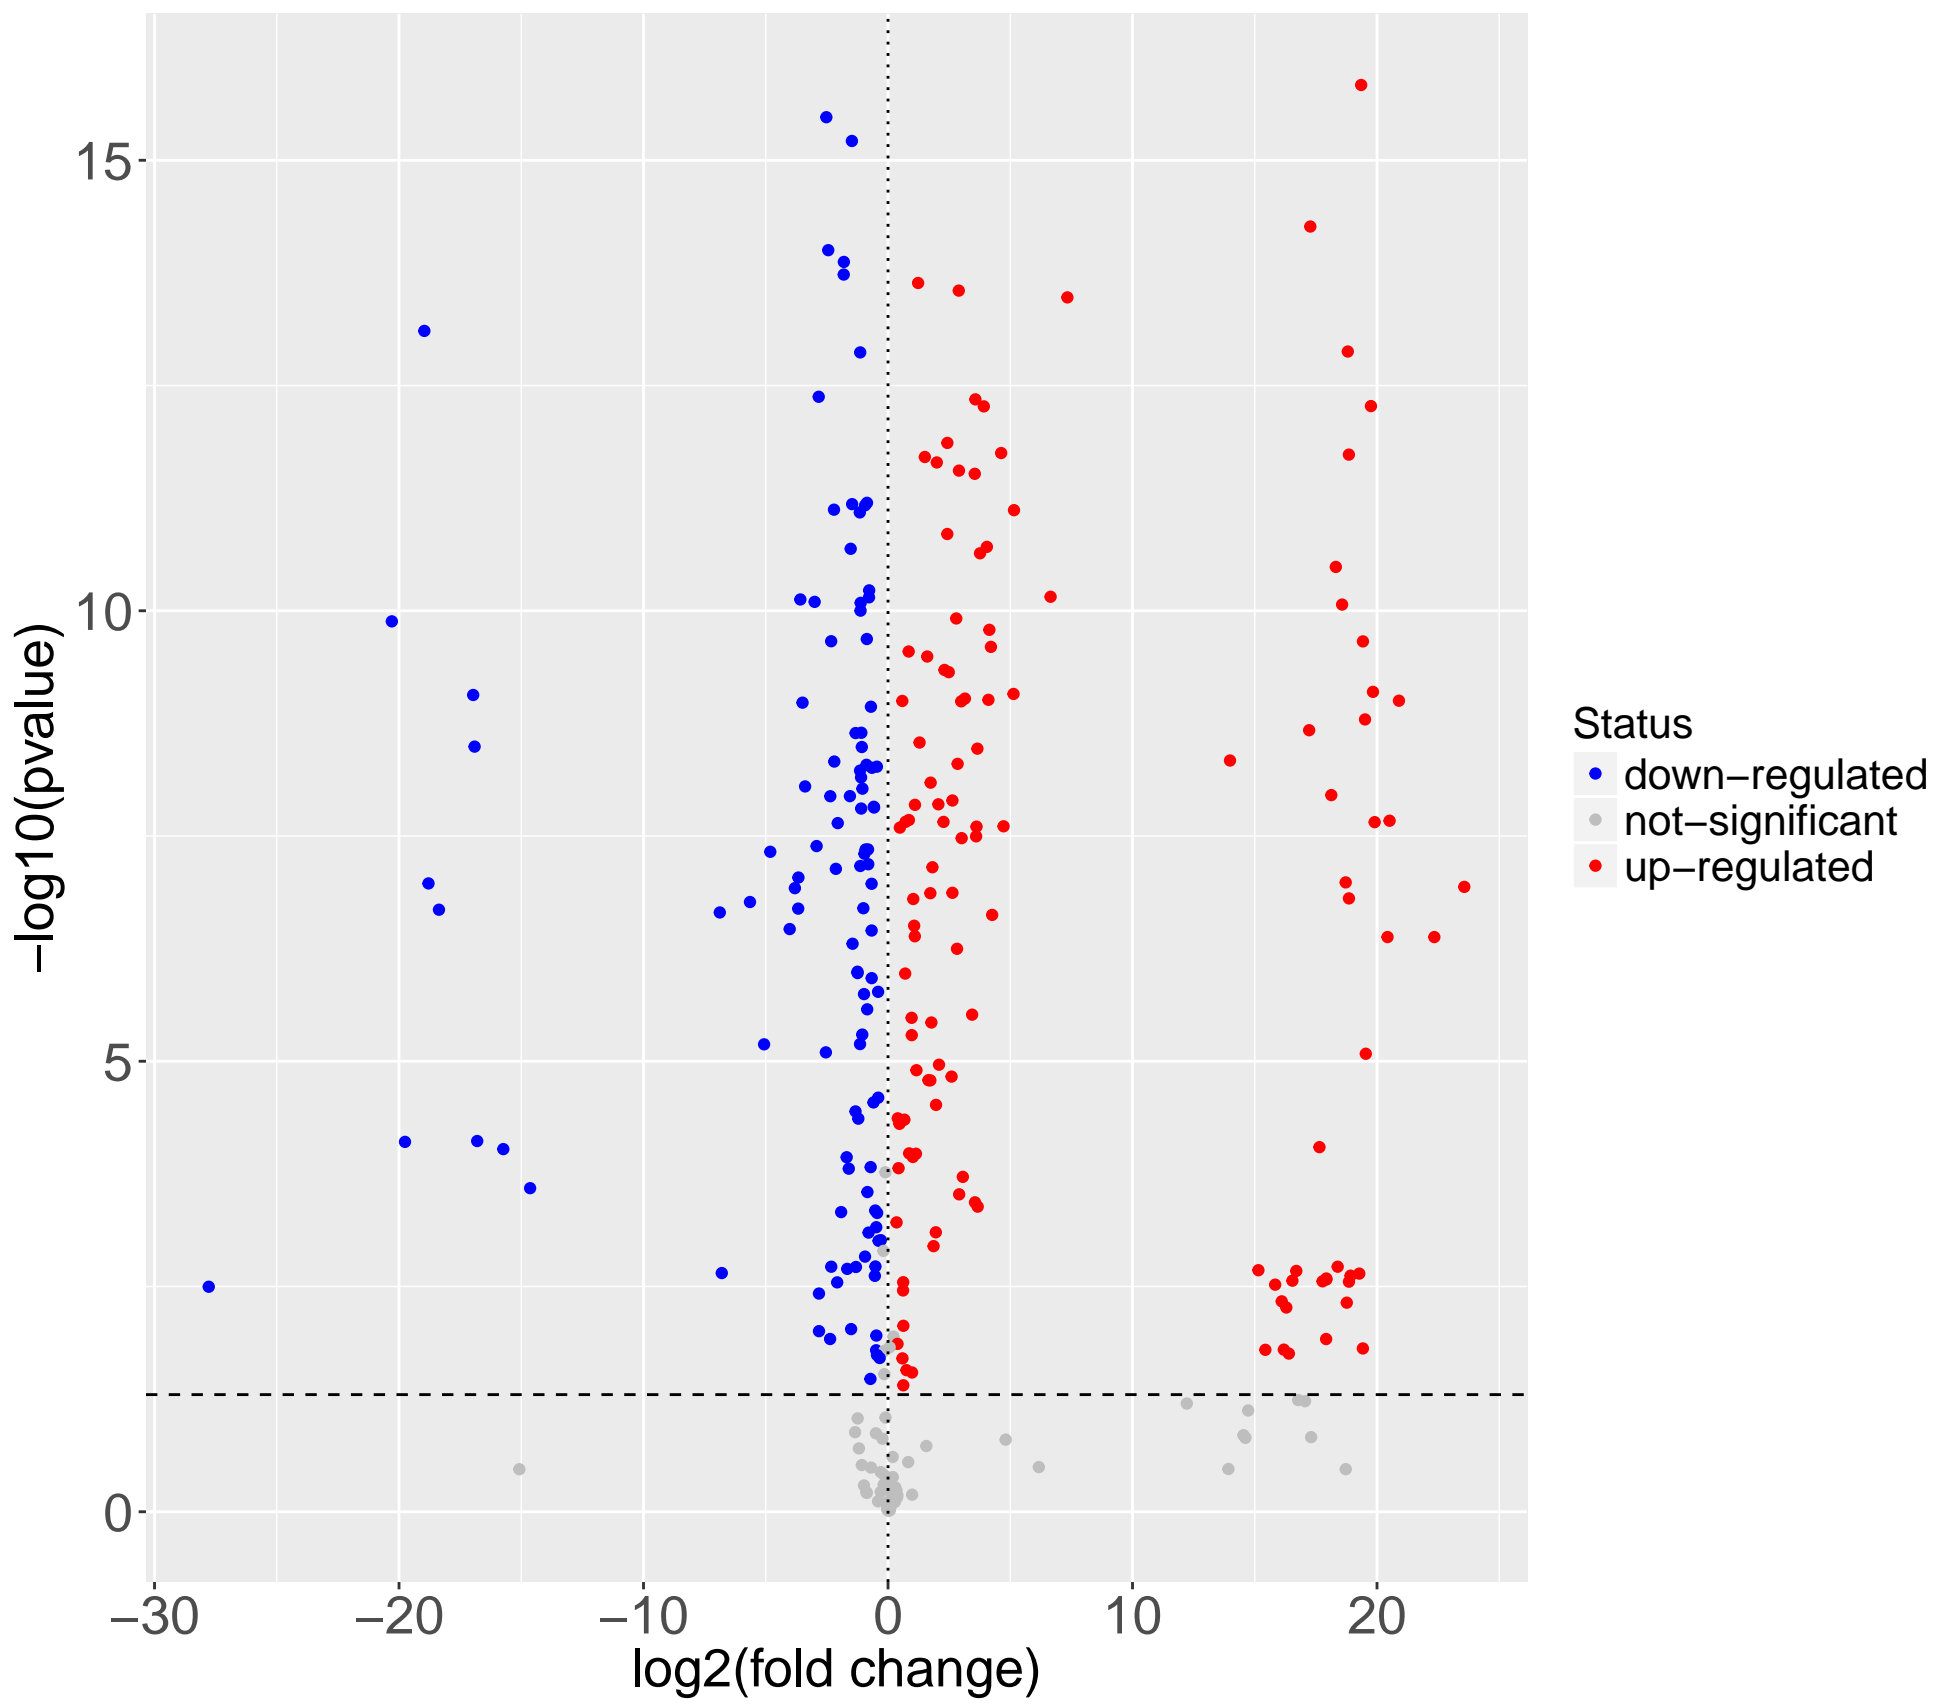

Supplement: s1 [file s1]

Volcanoplot

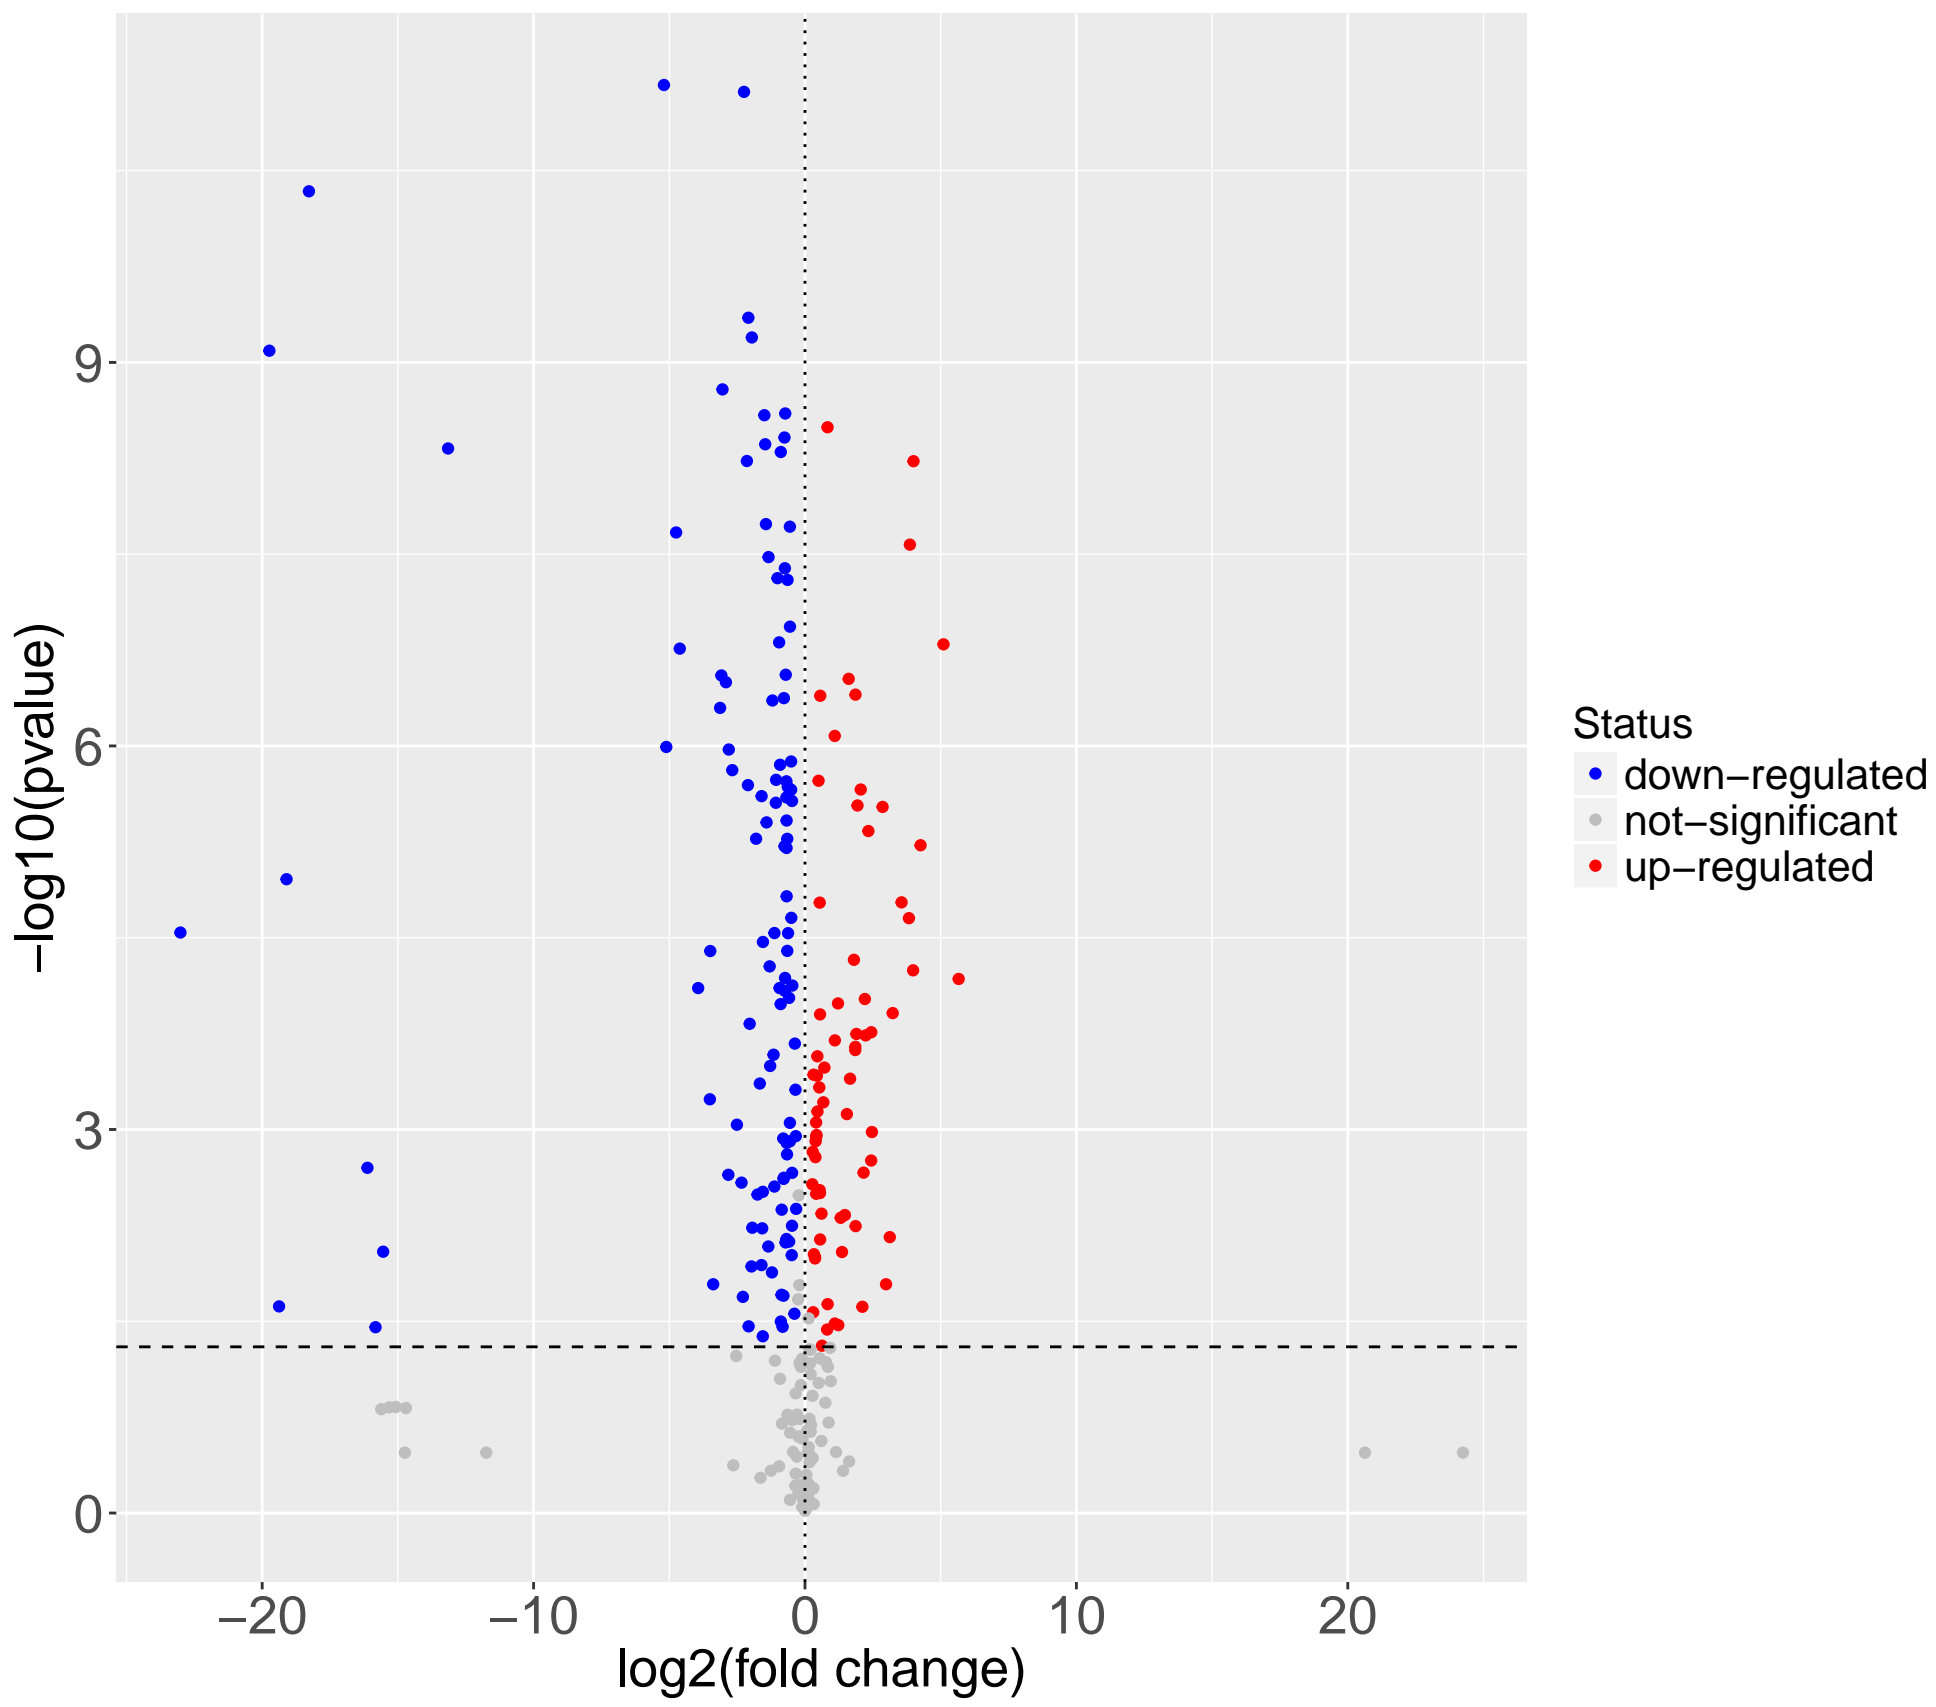

Supplement: s1 [file s1]

Volcanoplot

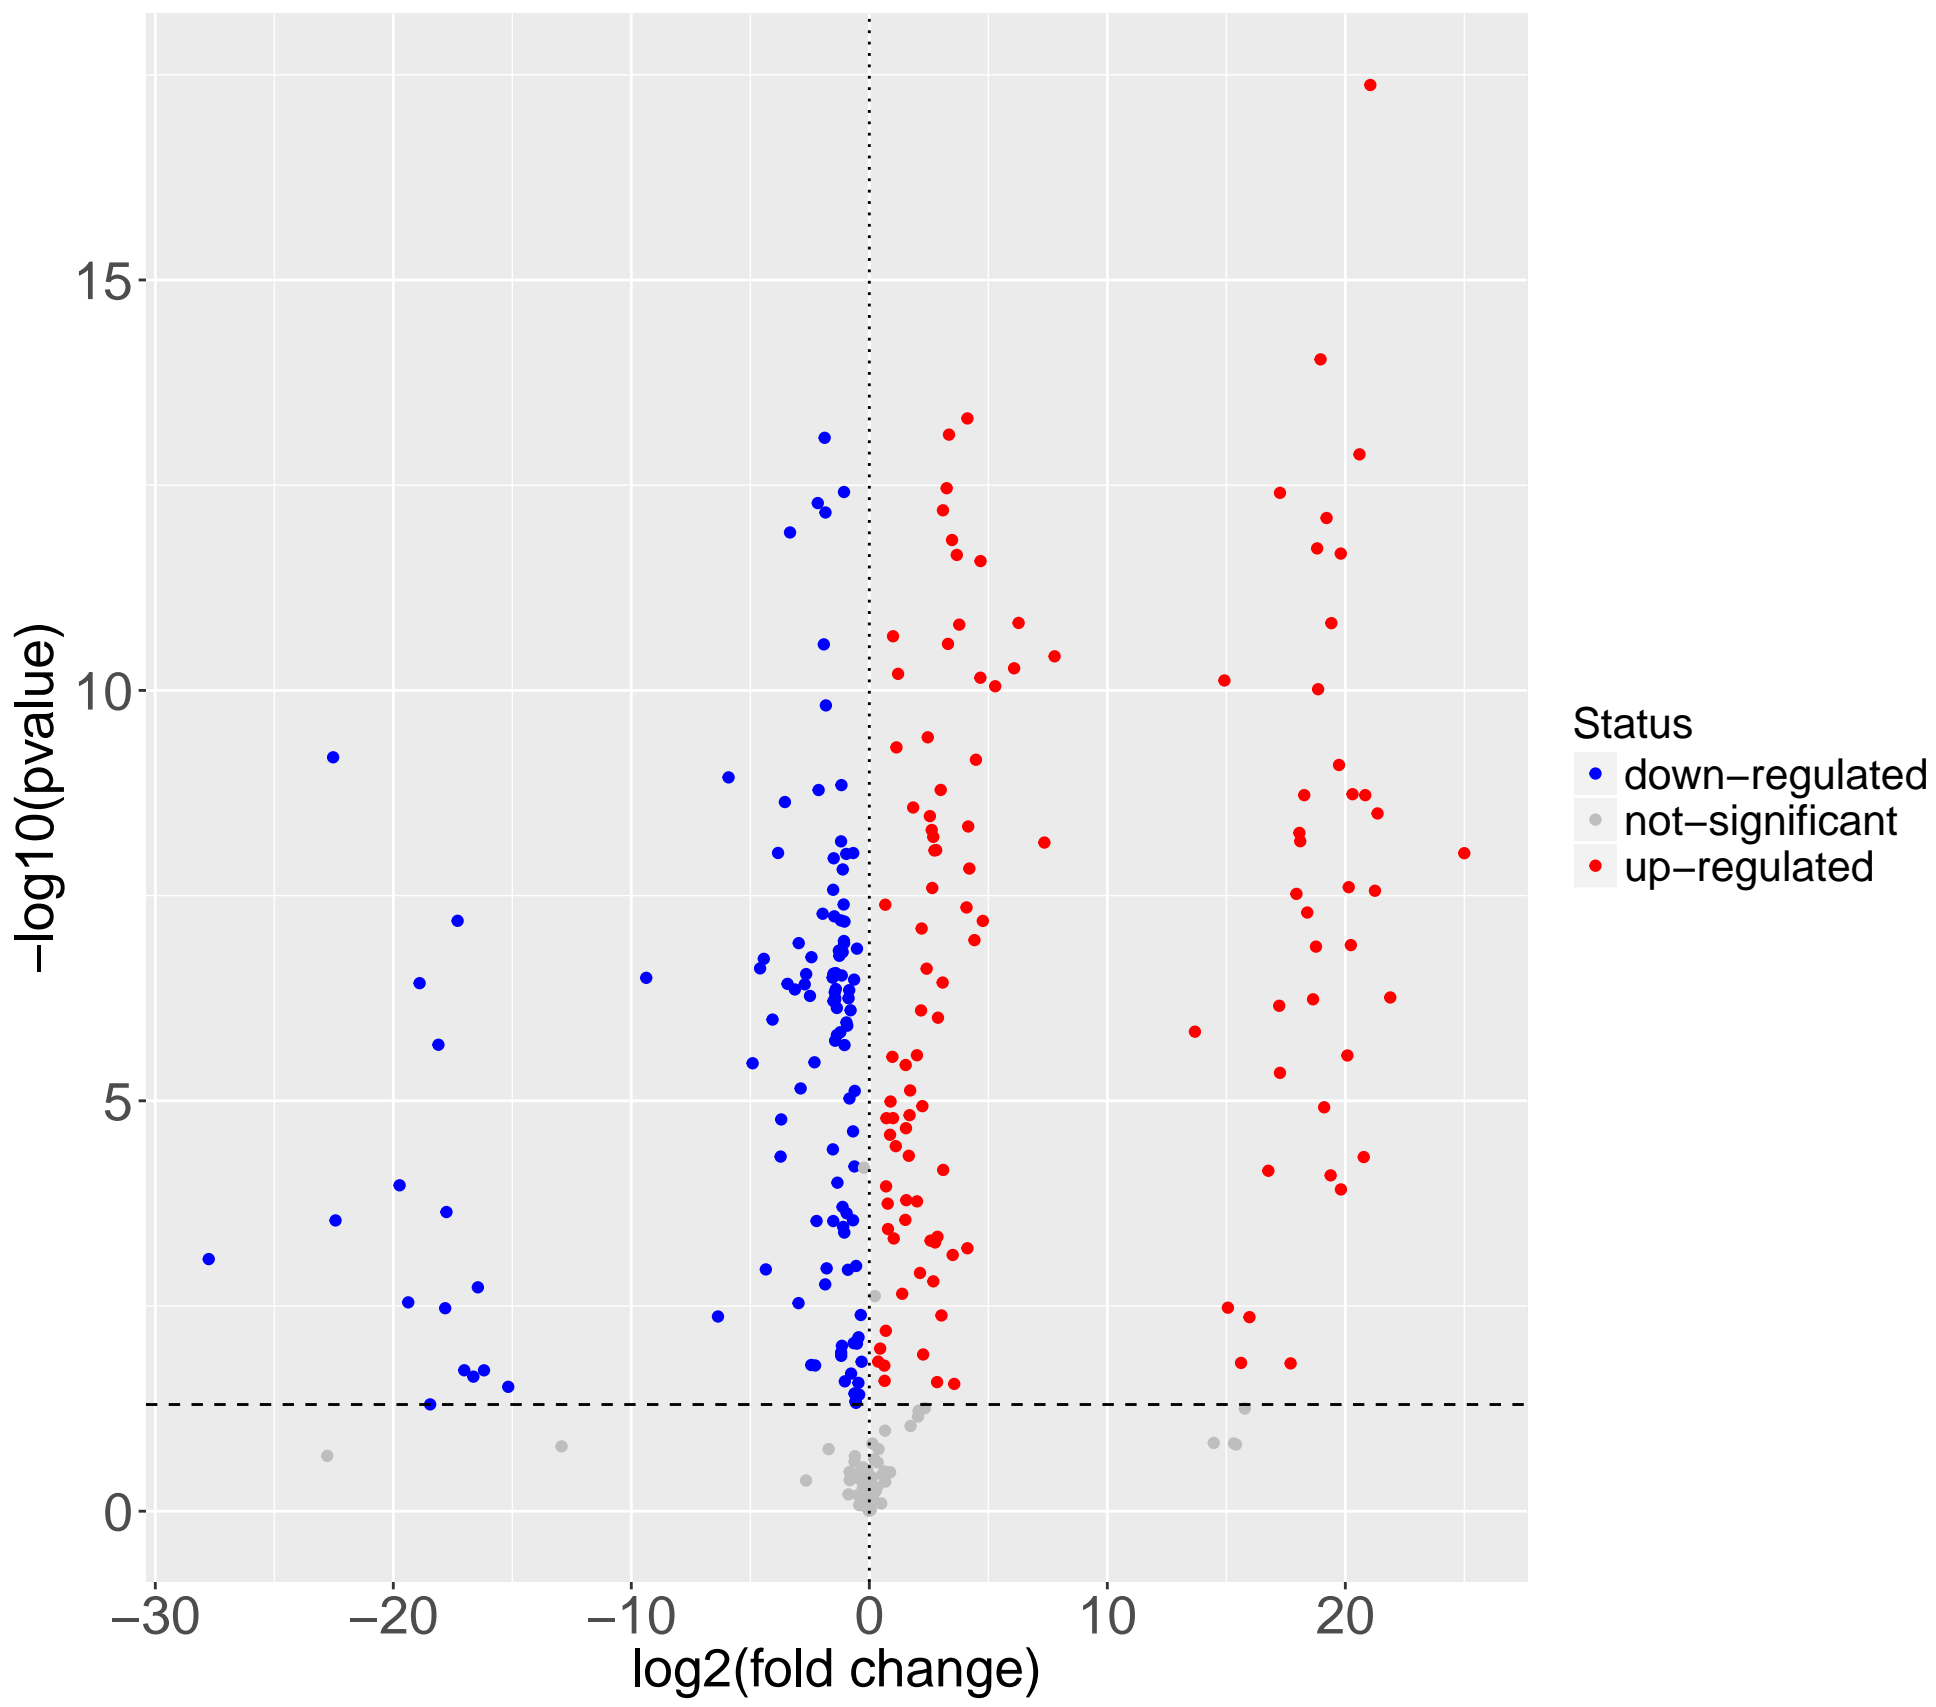

Supplement: s1 [file s1]

Volcanoplot

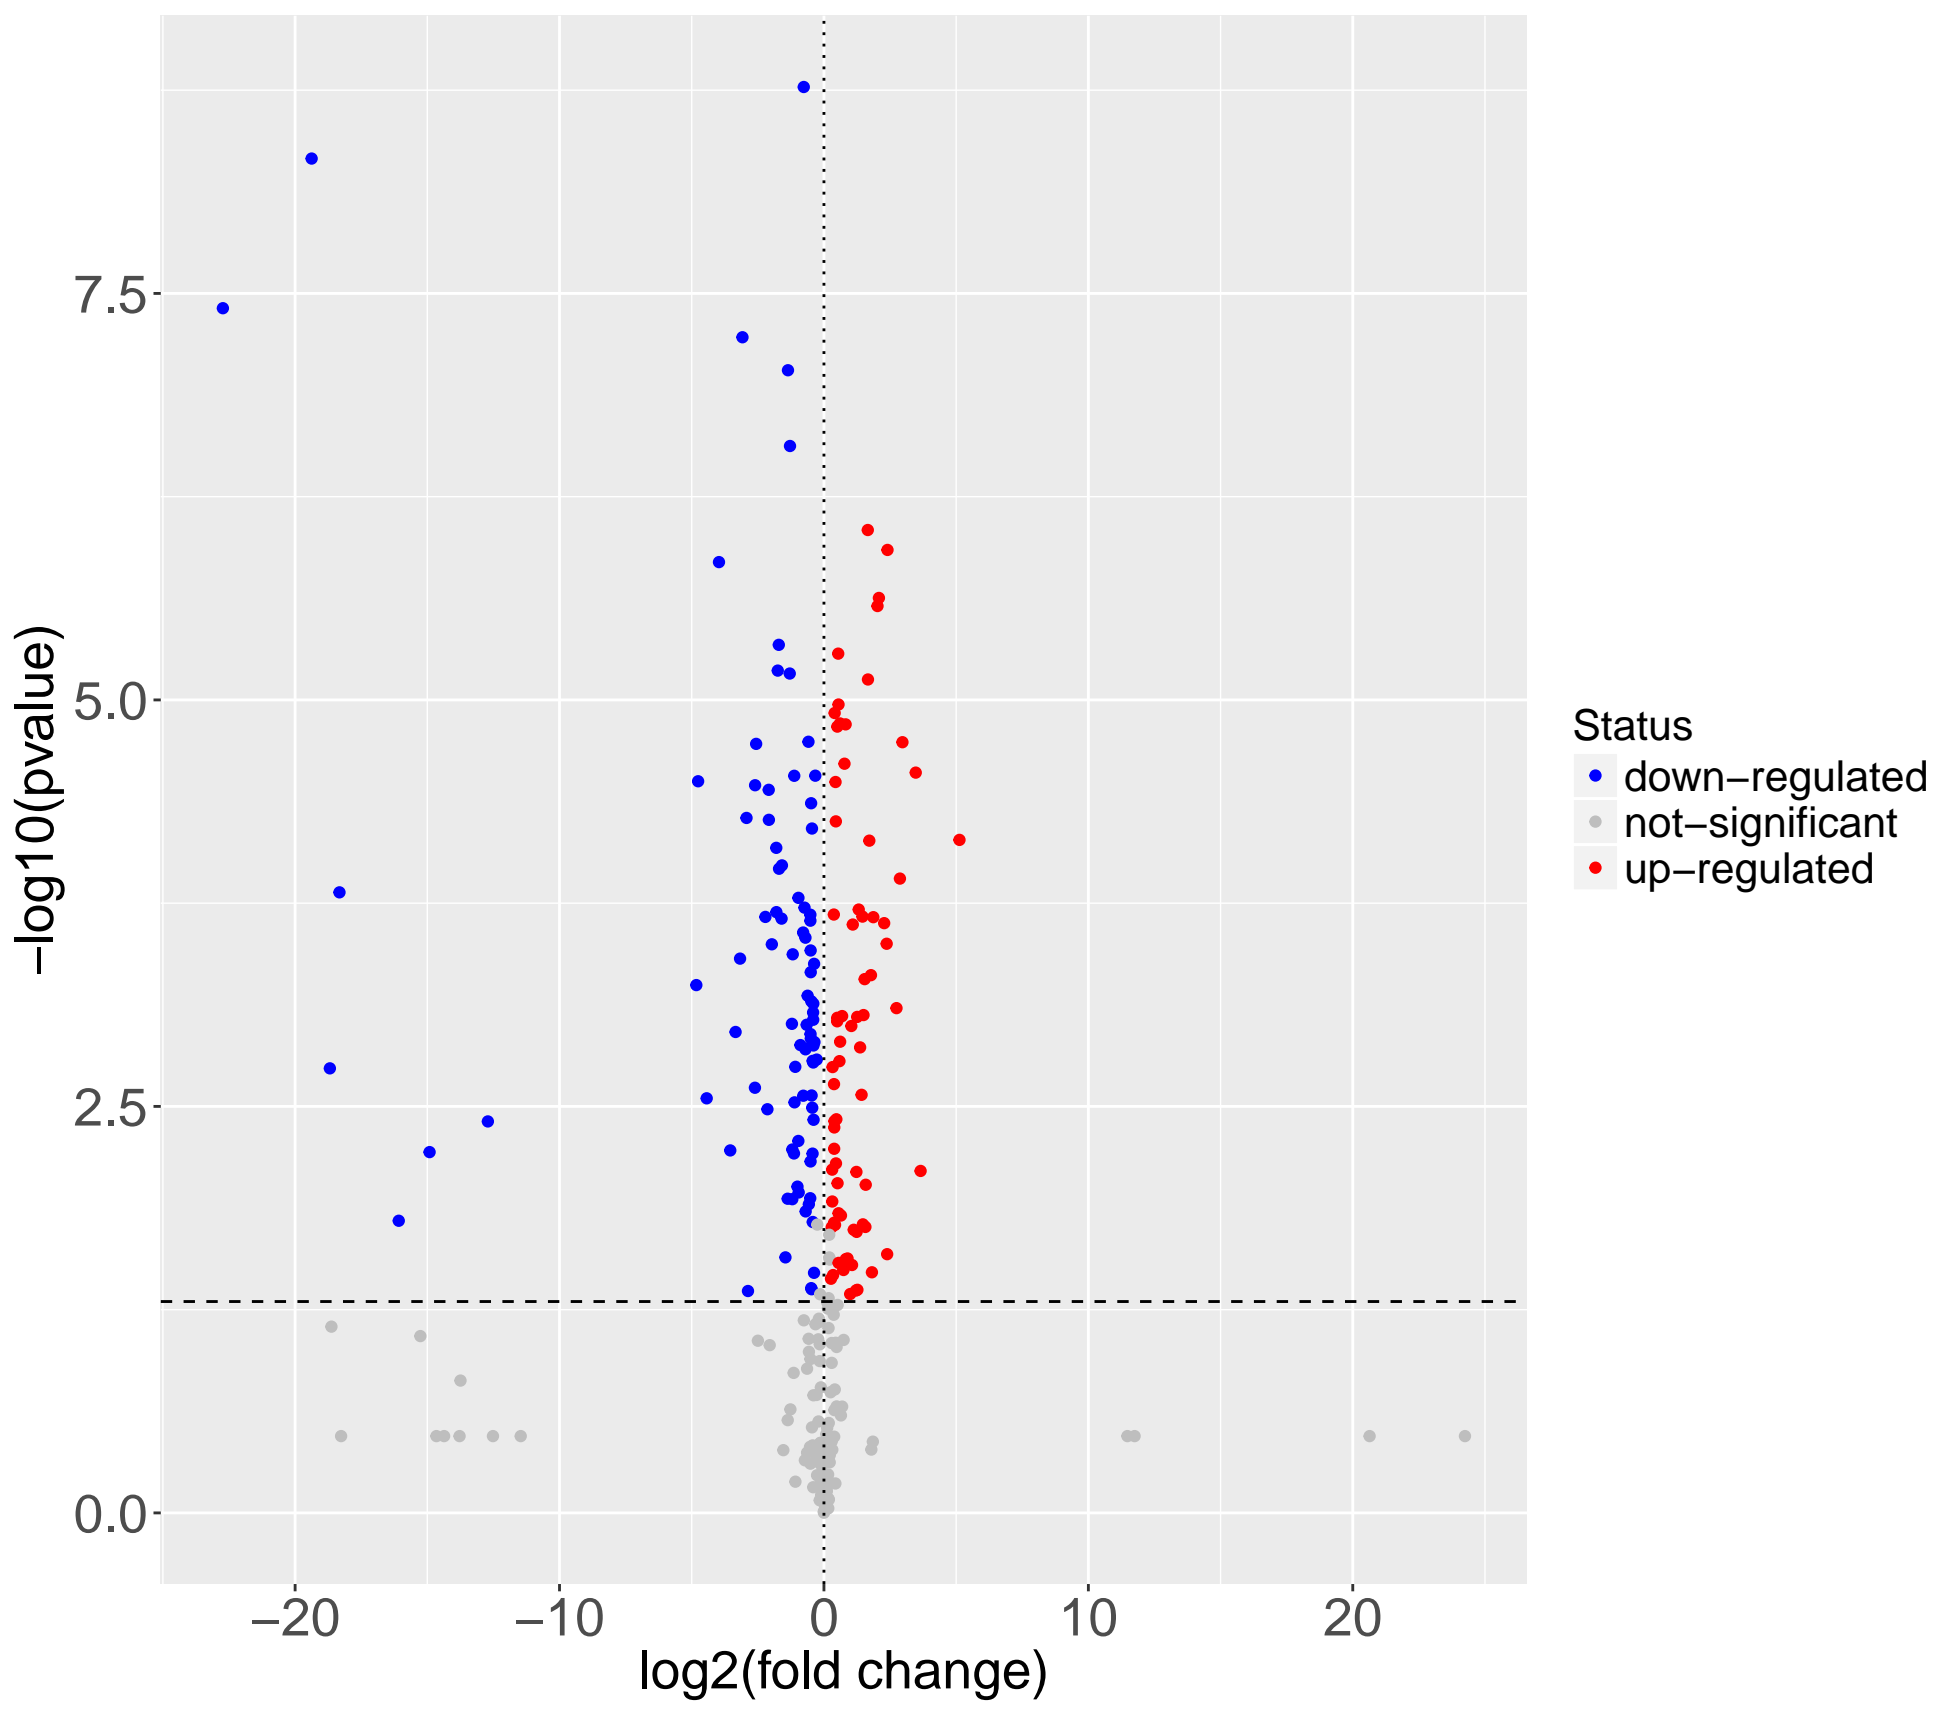

Supplement: s1 [file s1]

Volcanoplot

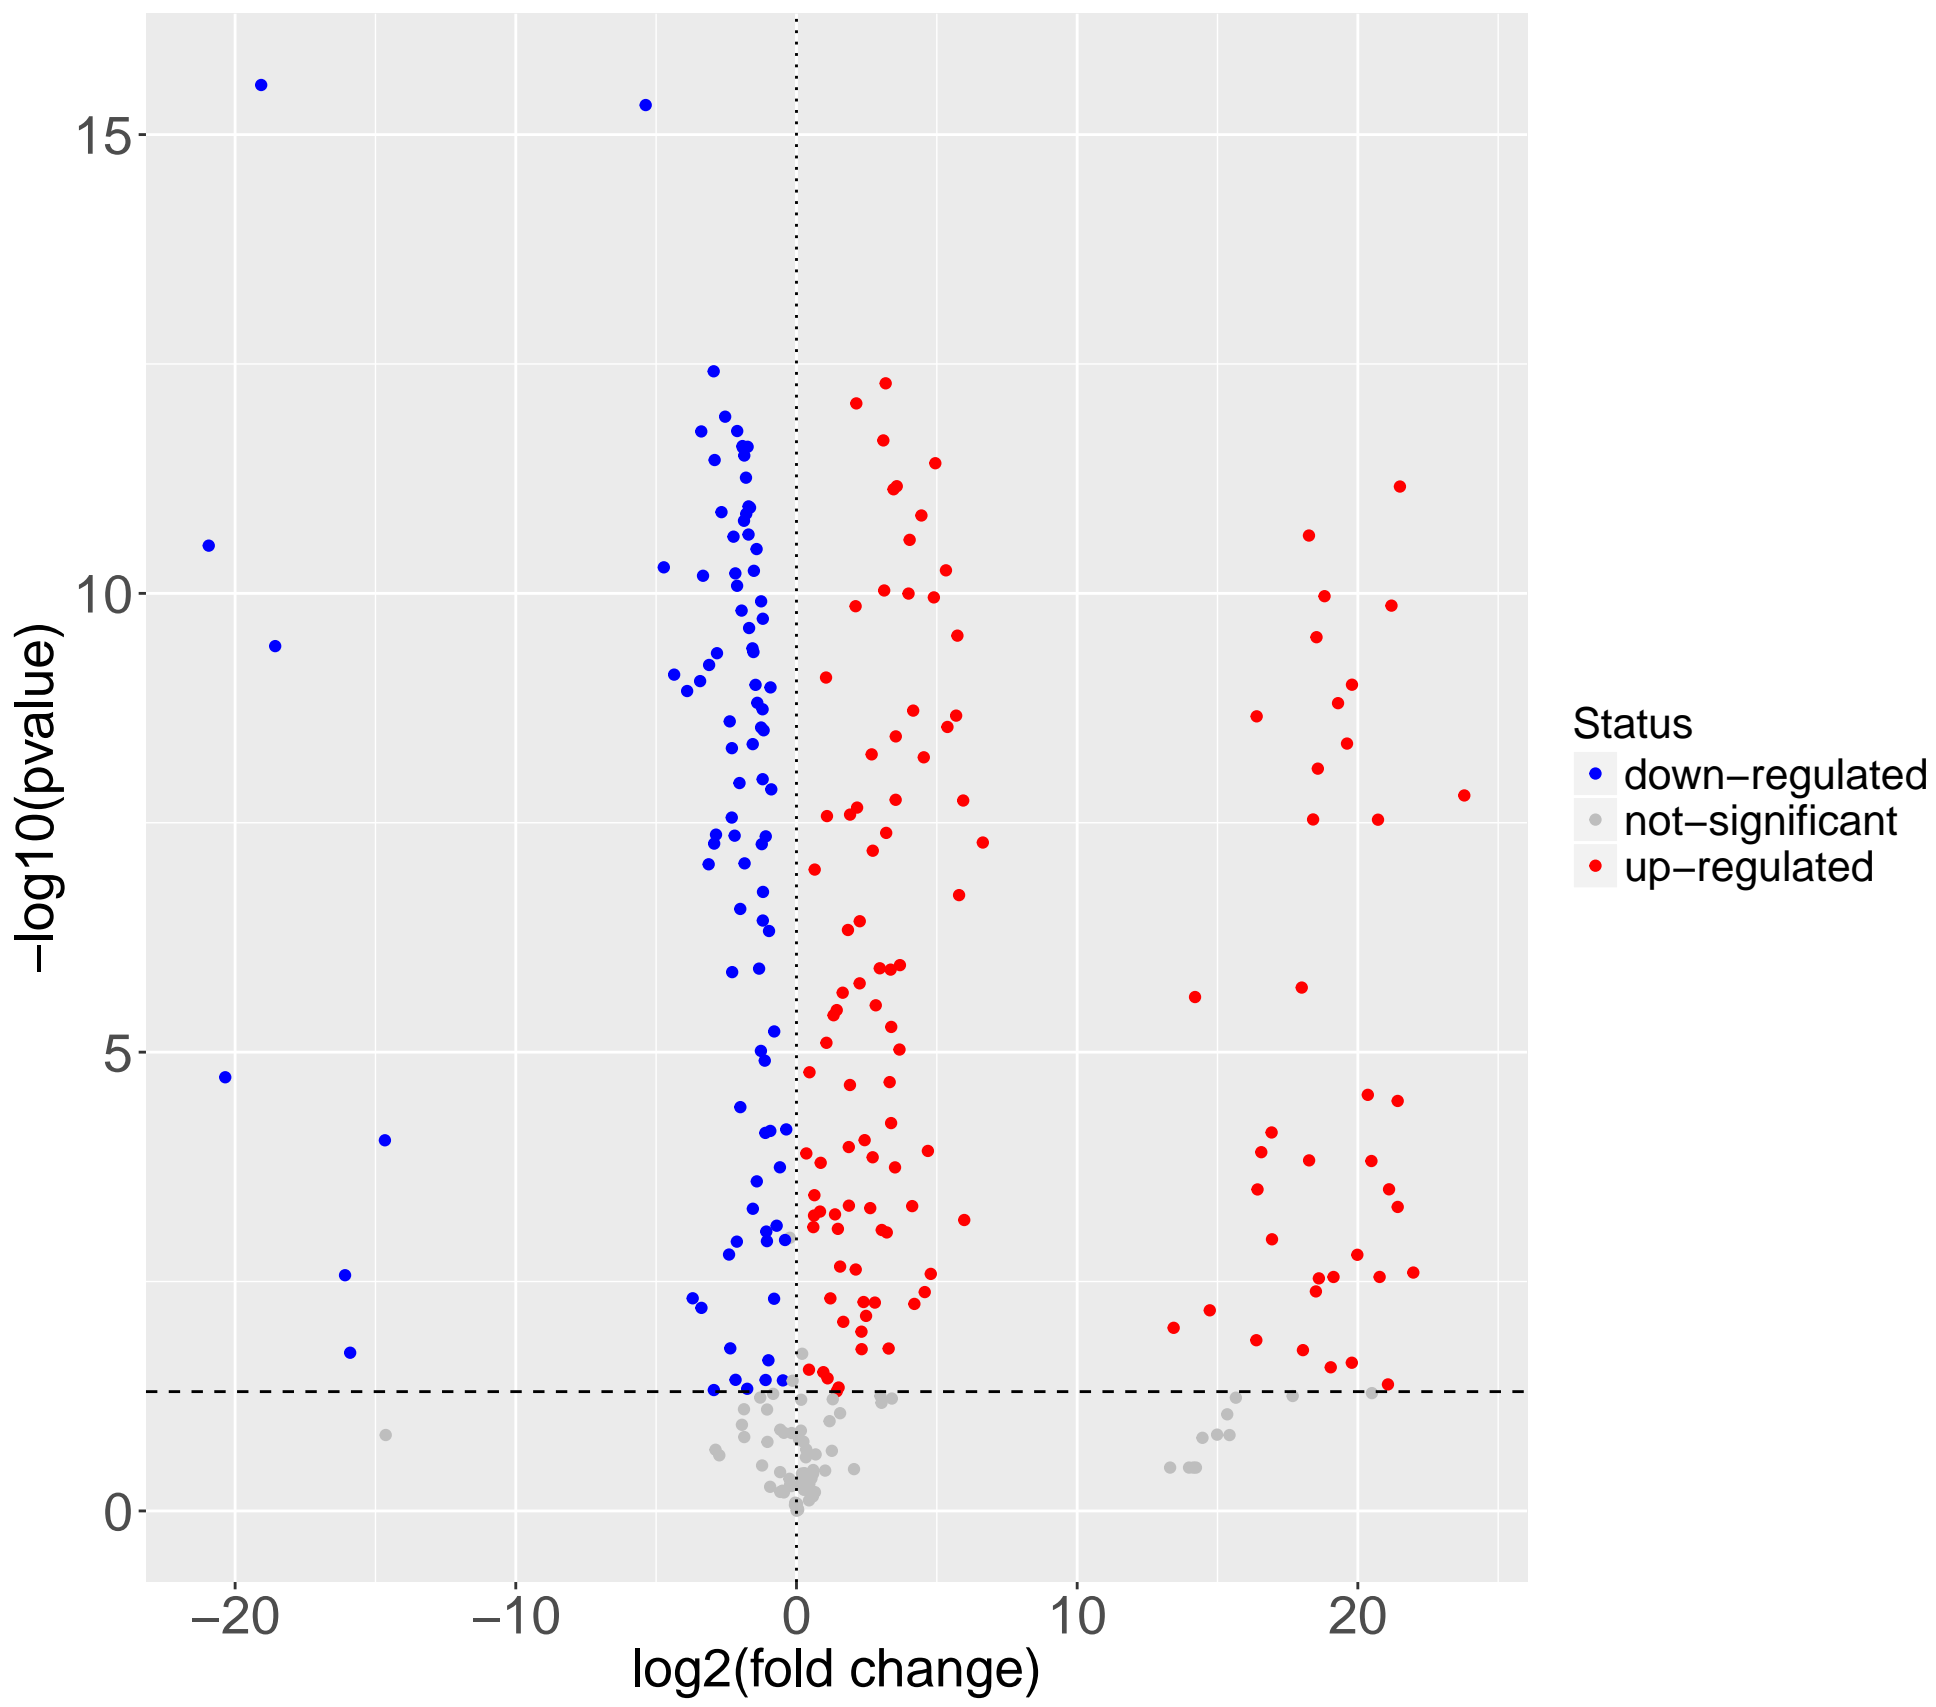

Supplement: s1 [file s1]

Volcanoplot

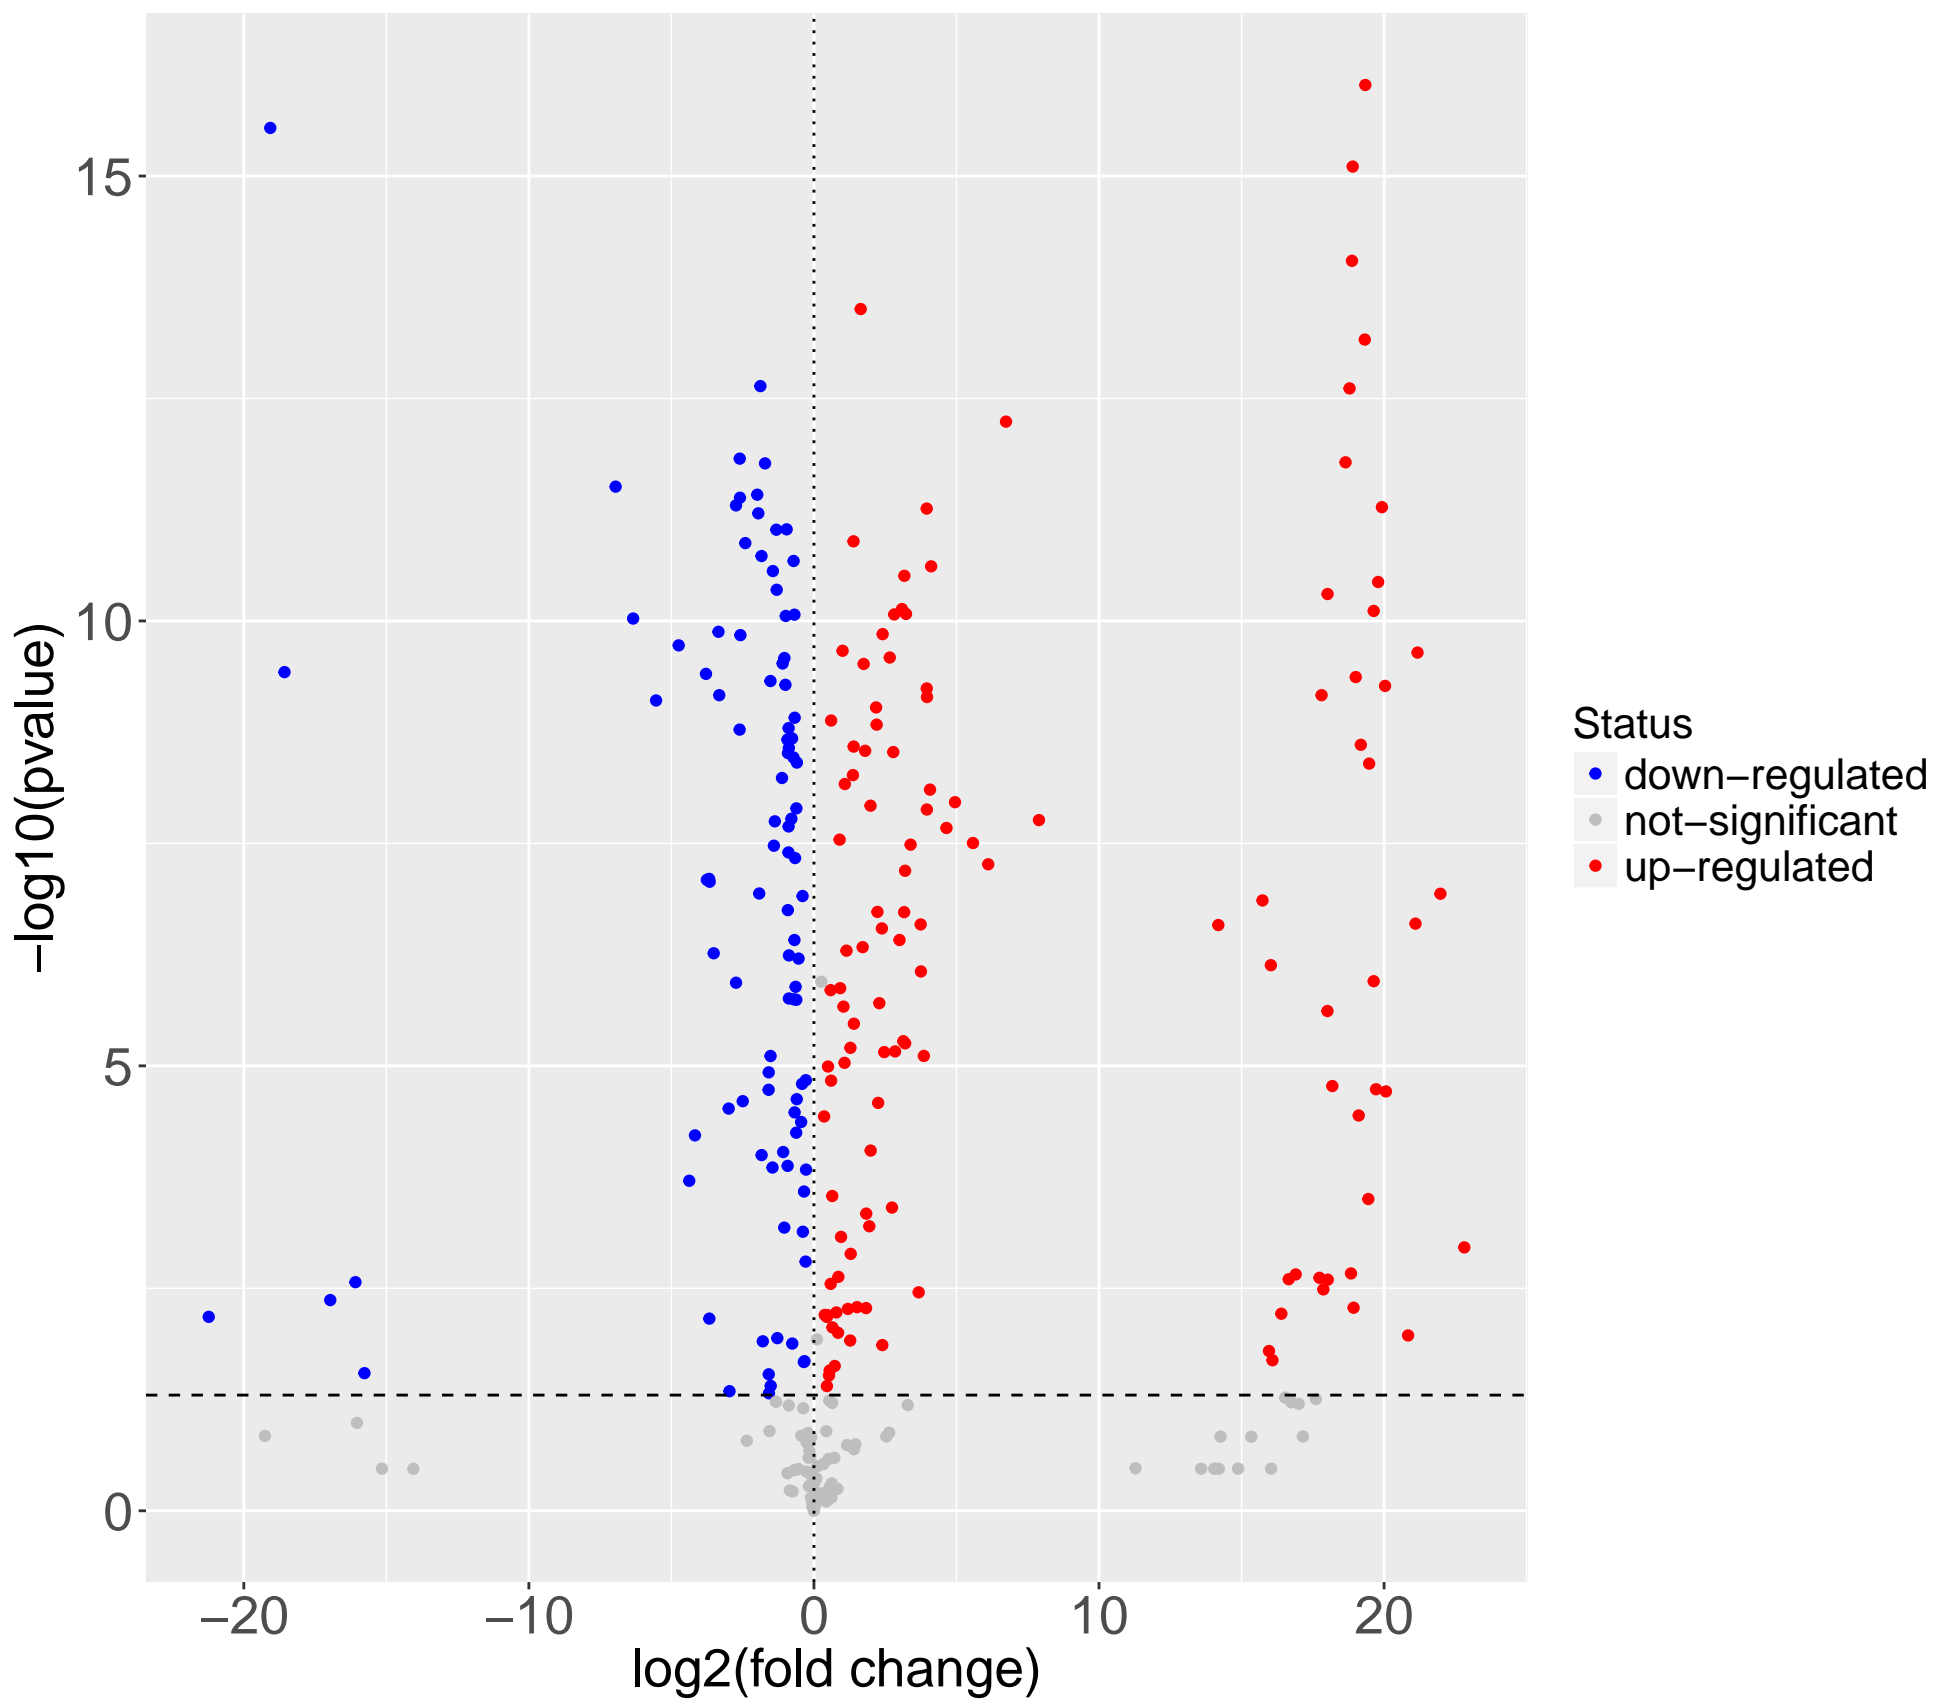

Supplement: s1 [file s1]

Volcanoplot

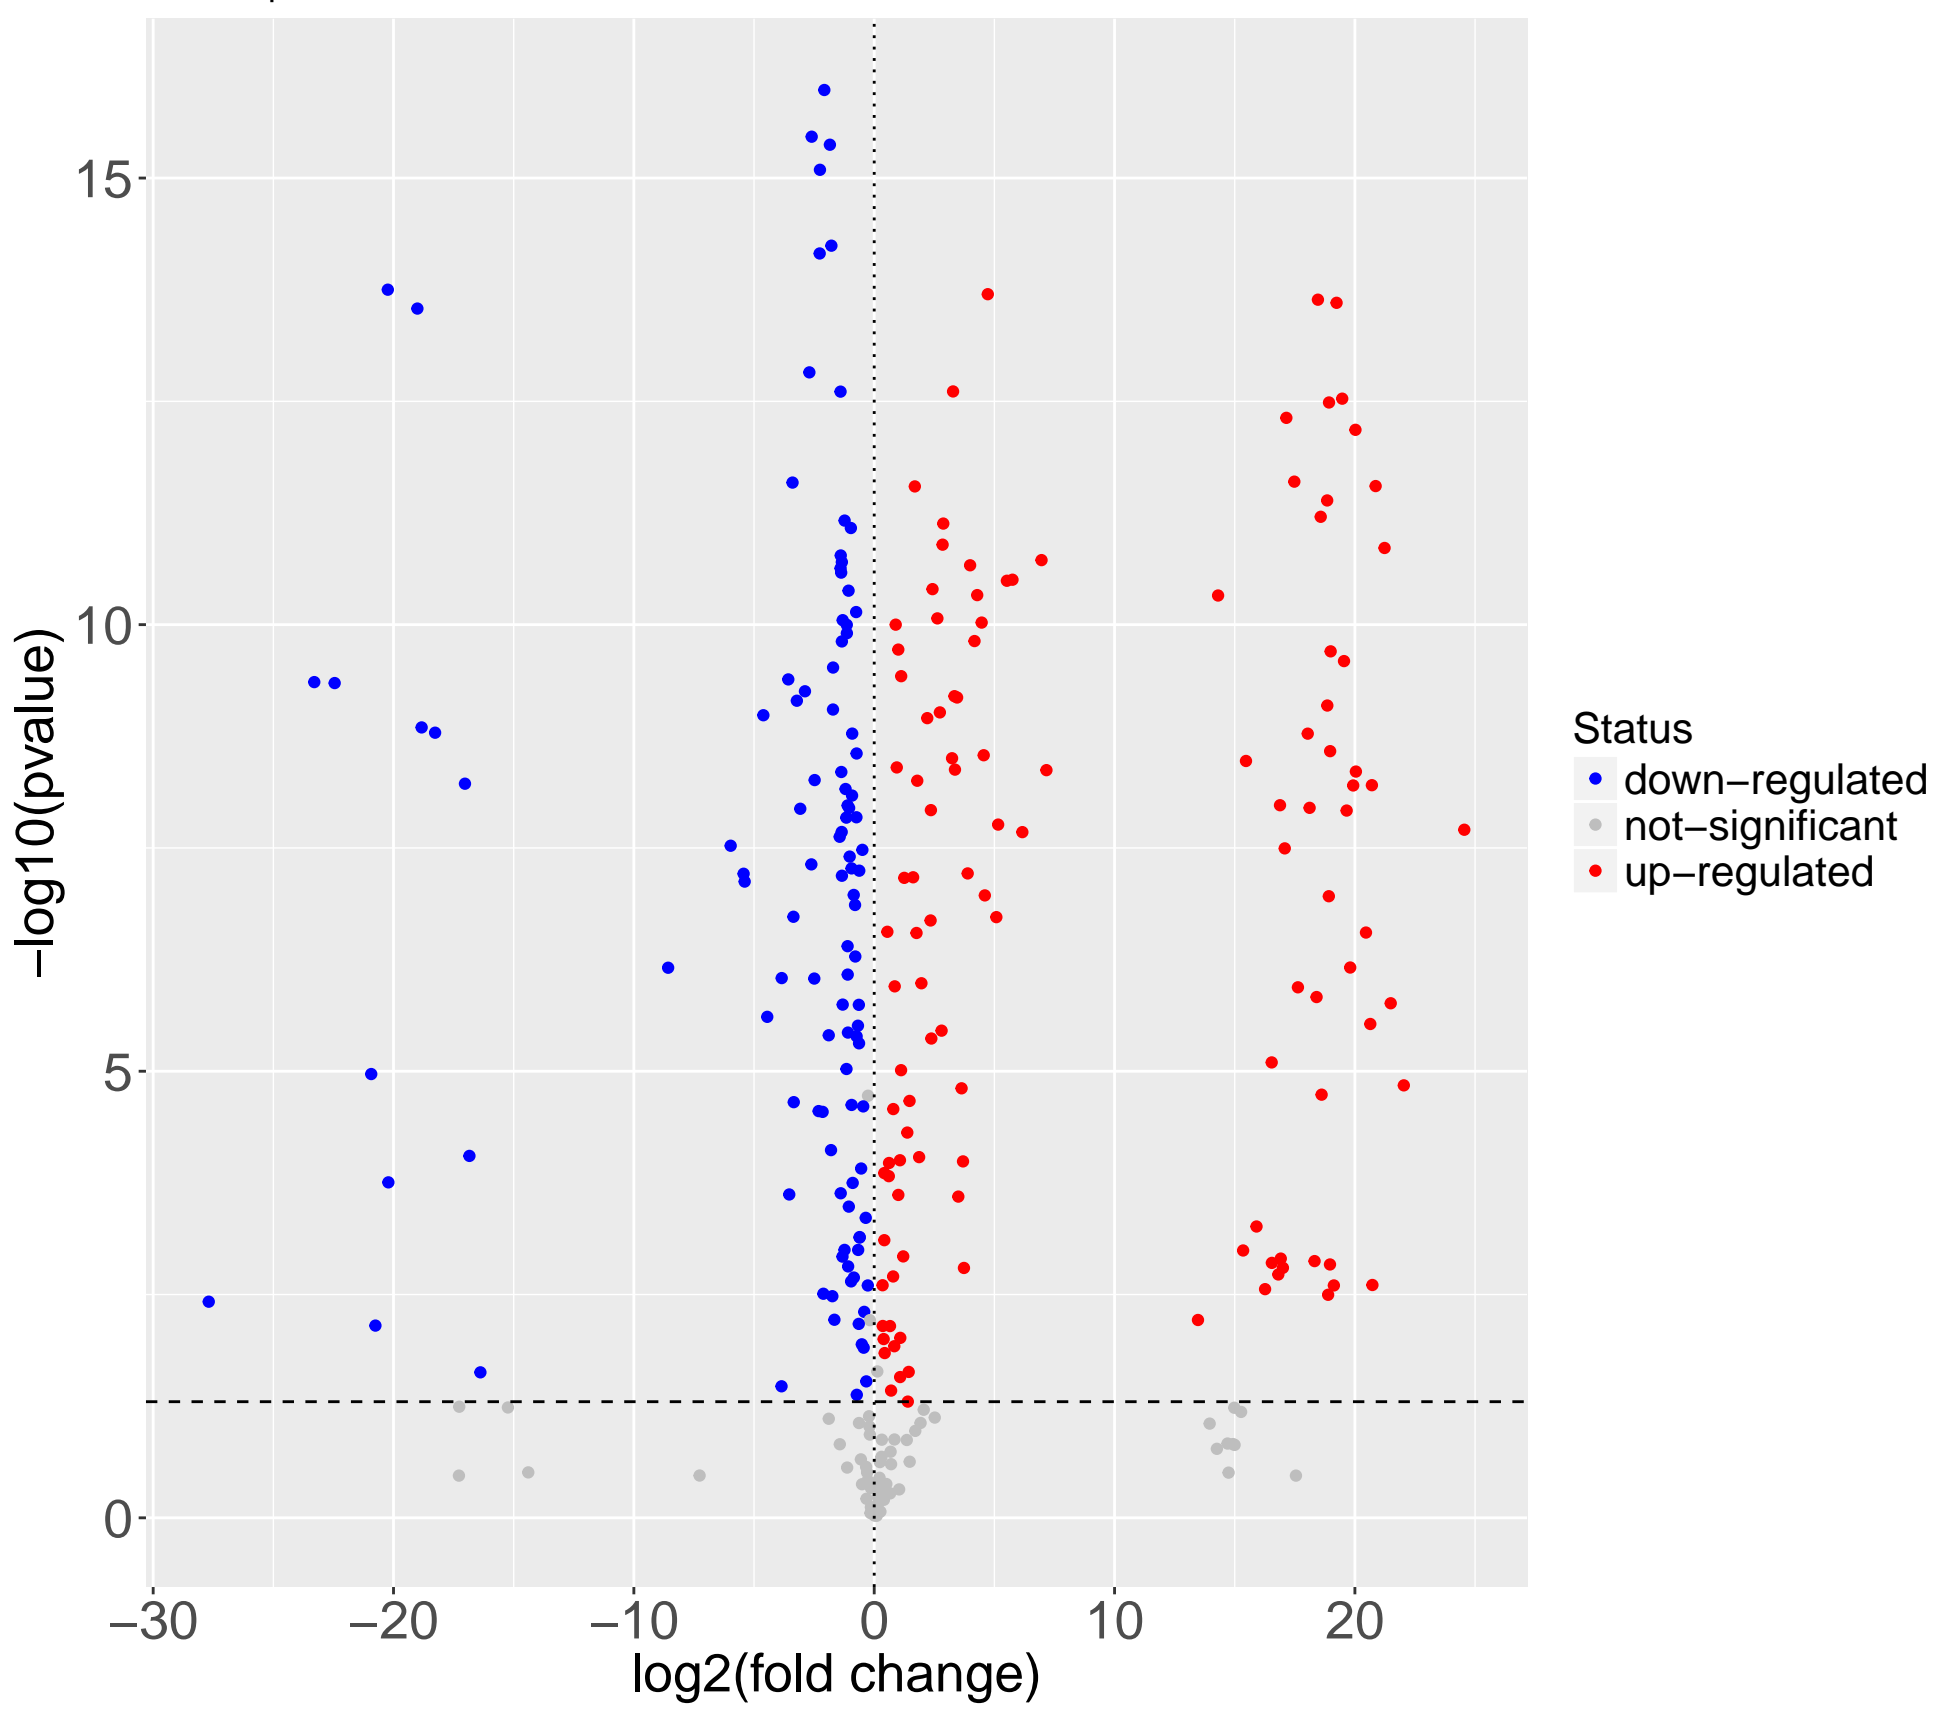

Supplement: s1 [file s1]
